# Supplementary material for: Splicing imbalances in basal-like breast cancer underpin perturbation of cell surface and oncogenic pathways and are associated with patients’ survival
Source: PubMed Central journal article supplement (PMC5216415; doi:10.1038/srep40177), 2017-01-06
Supplement: srep40177-s1.pdf [file srep40177-s1.pdf]

**Splicing imbalances in basal-like breast cancer underpin perturbation of cell surface and oncogenic pathways and are associated with patients' survival**

Filipe Gracio, Brian Burford, Patrycja Gazinska, Anca Mera, Aisyah Mohd Noor, Pierfrancesco Marra, Cheryl Gillett, Anita Grigoriadis, Sarah Pinder, Andrew Tutt\* and Emanuele de Rinaldis\*

\*corresponding authors

Negative
  Positive
  Not Available

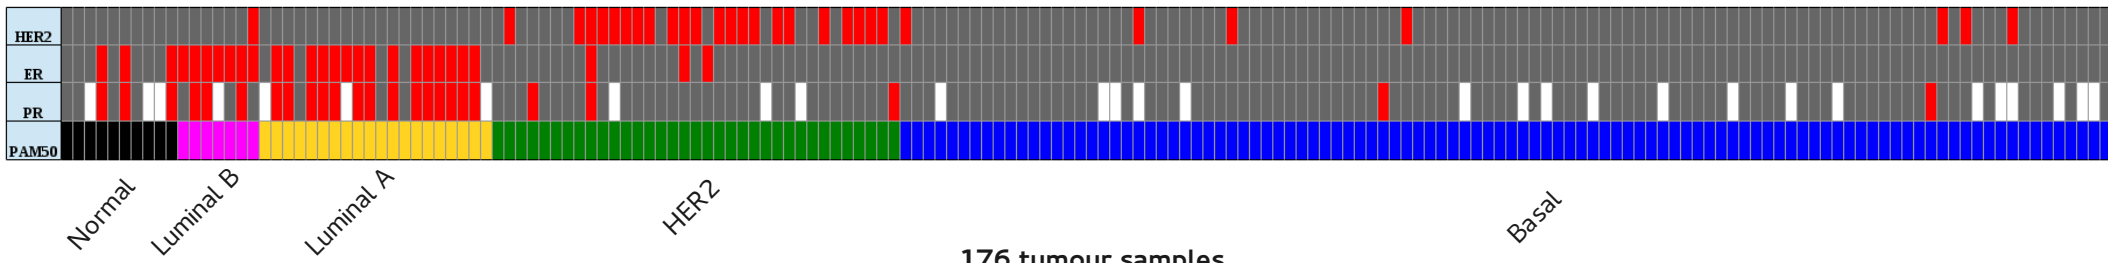

176 tumour samples

|                                 |                                 |             |
|---------------------------------|---------------------------------|-------------|
| <b>IHC-based Classification</b> | ER-                             | N=148 (84%) |
|                                 | ER+                             | N=28 (16%)  |
|                                 | HER2+                           | N=30 (17%)  |
|                                 | ER- PR- HER2- (Triple-Negative) | N=93 (53%)  |
| <b>Molecular Subtype</b>        | Basal-Like                      | N=104 (59%) |
|                                 | HER2                            | N=35 (20%)  |
|                                 | Luminal A                       | N=20 (11%)  |
|                                 | Luminal B                       | N=7 (4%)    |
|                                 | Normal-like                     | N=10 (6%)   |

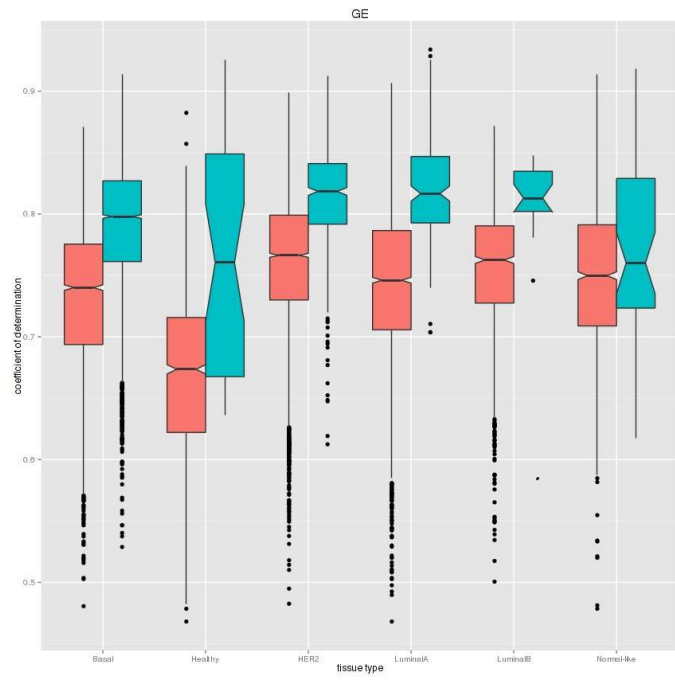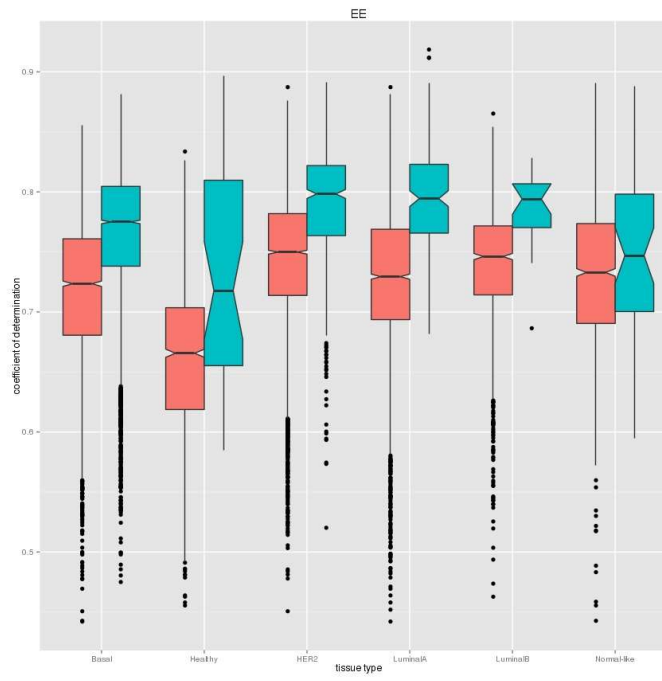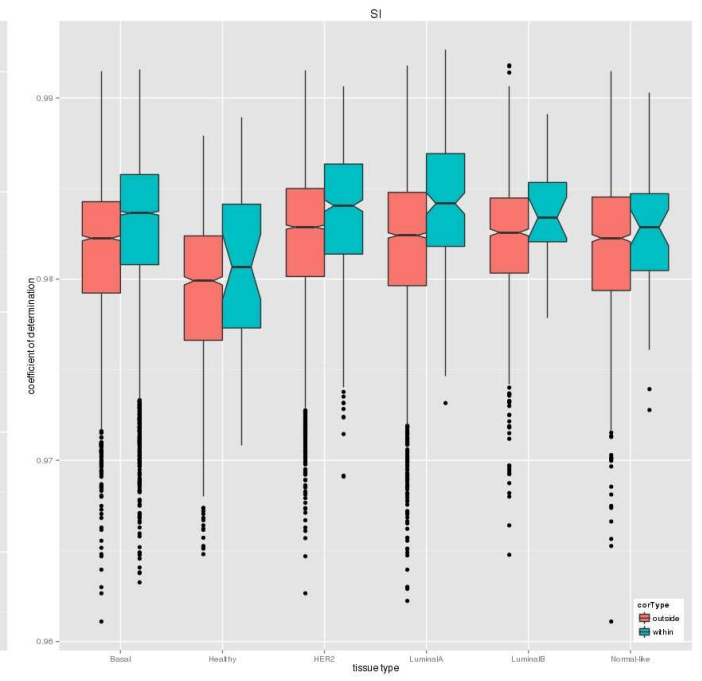

Supplemental File 3

**Basal-like vs HER2**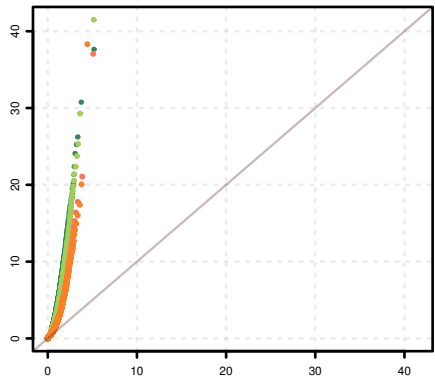**Basal-like vs Luminal-A**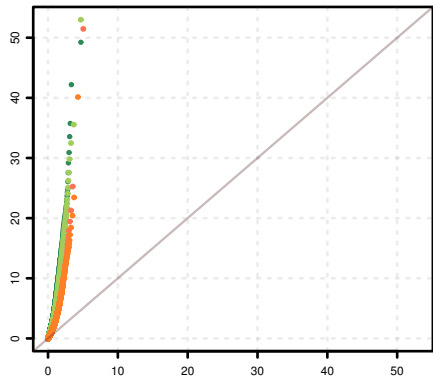**Basal-like vs Luminal-B**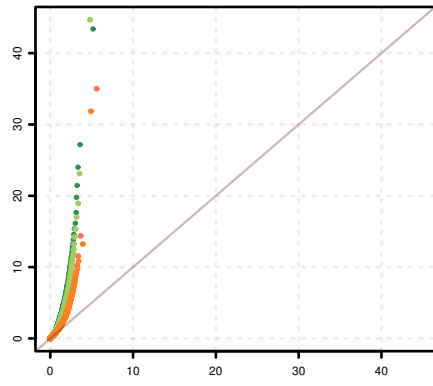**Basal-like vs Normal-like**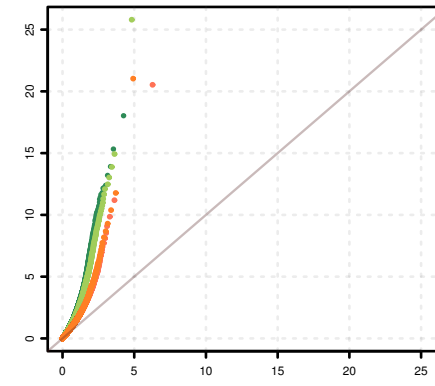**Basal-like vs NBT**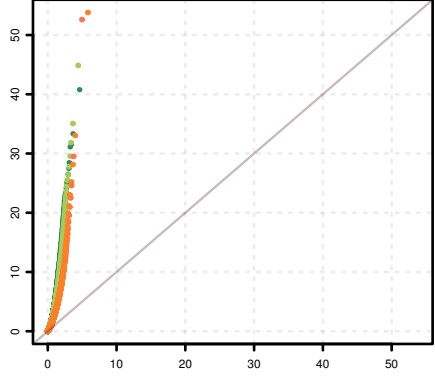**HER2 vs Luminal-A**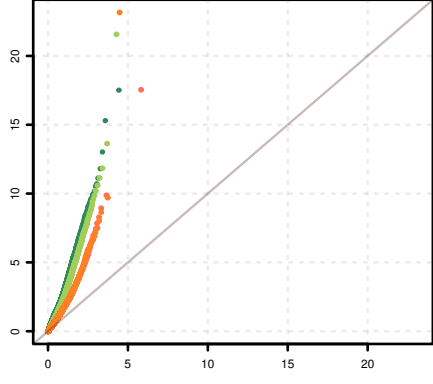**HER2 vs Luminal-B**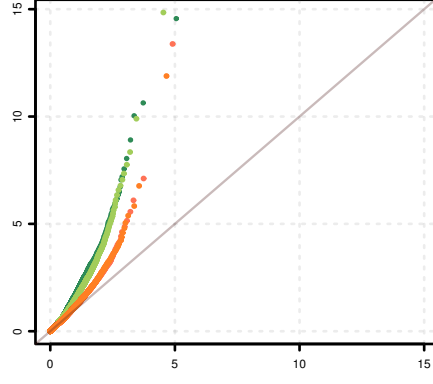**HER2 v Normal-like**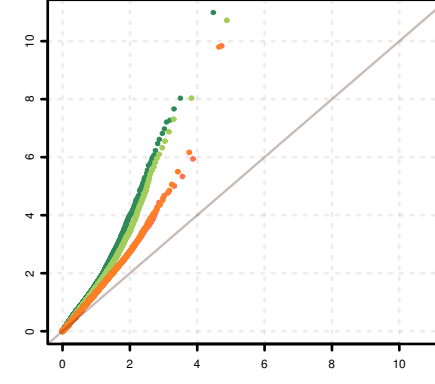**HER2 vs NBT**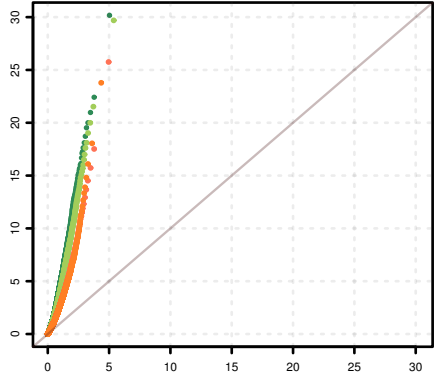**Luminal-A vs Luminal-B**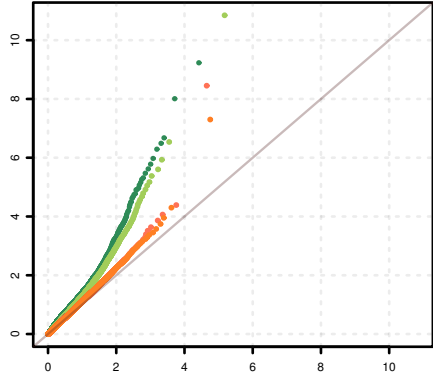**Luminal-A vs Normal-like**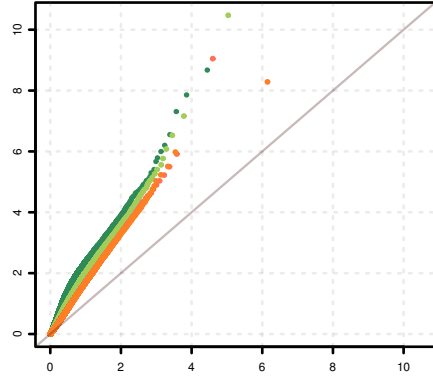**Luminal-A vs NBT**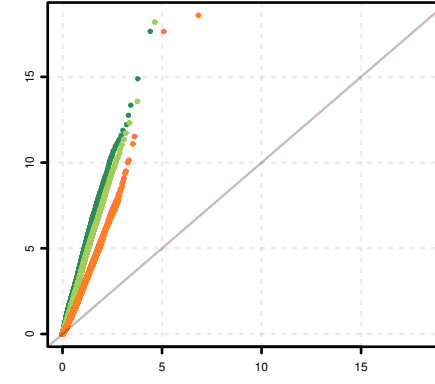**Luminal-B vs Normal-like**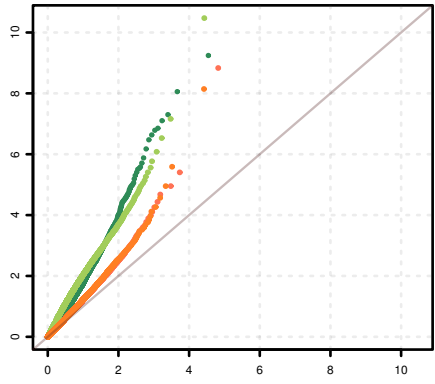**Luminal-B vs NBT**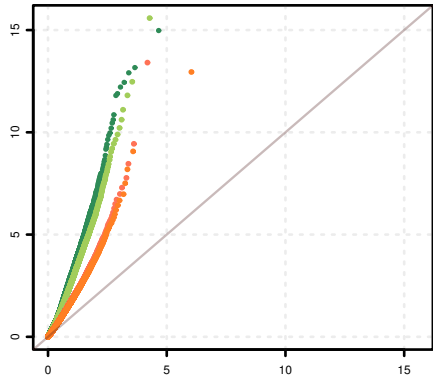**Normal-like vs NBT**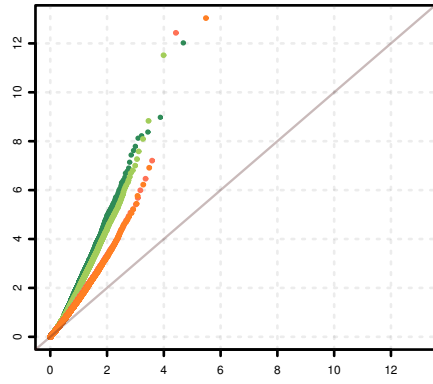**Others vs NBT**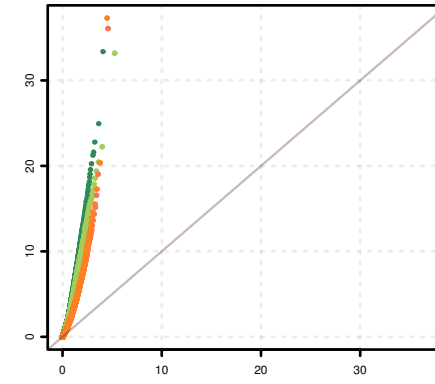**Basal-like vs Others**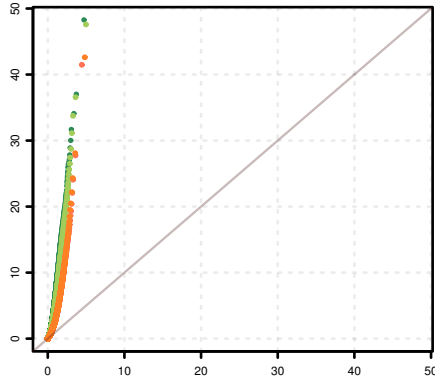**Triple Neg. vs NBT**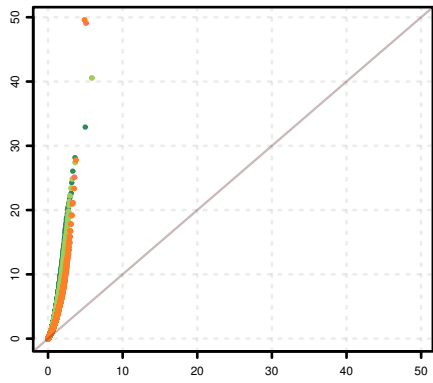**HER2 pos. vs NBT**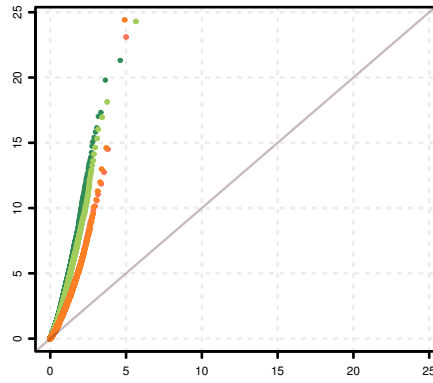**Triple Neg. vs HER2 Pos.**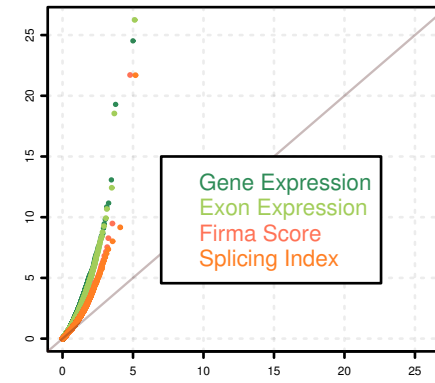

Gene Expression  
 Exon Expression  
 Firma Score  
 Splicing Index

Supplemental File 4

# Classification: Basal / NBT

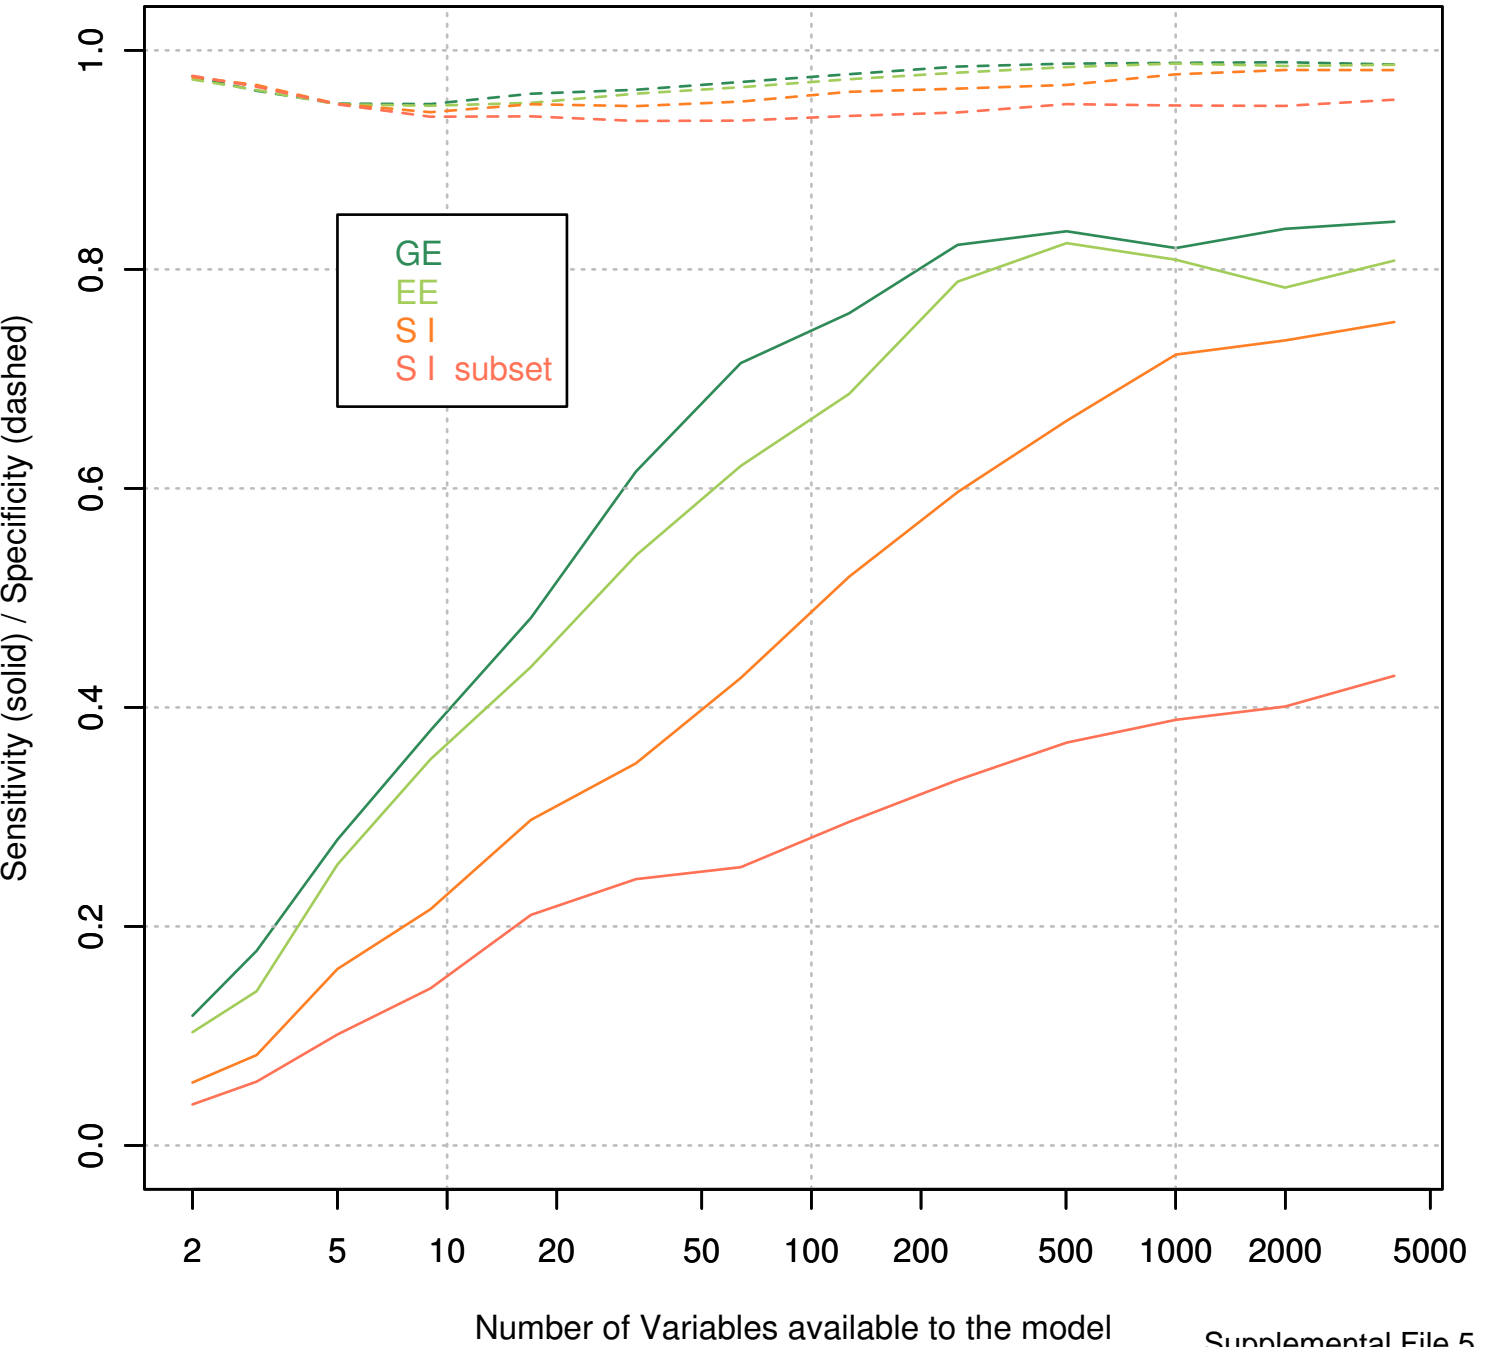

PCA with Gene Expression

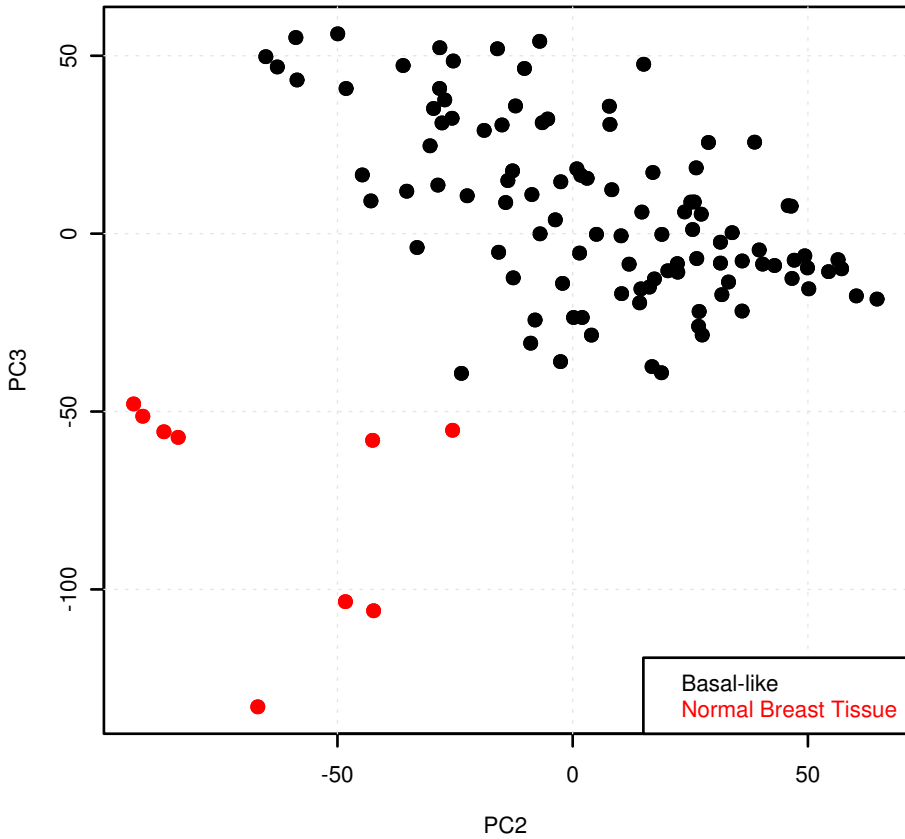

PCA with Exon Expression

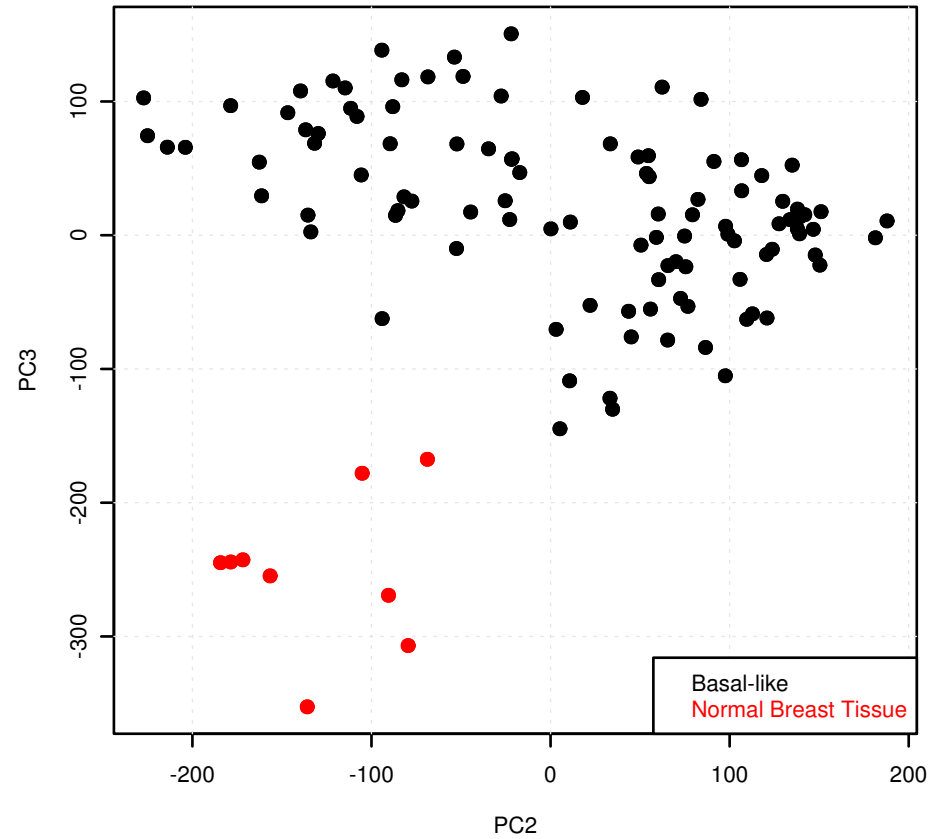

PCA with Splicing Index

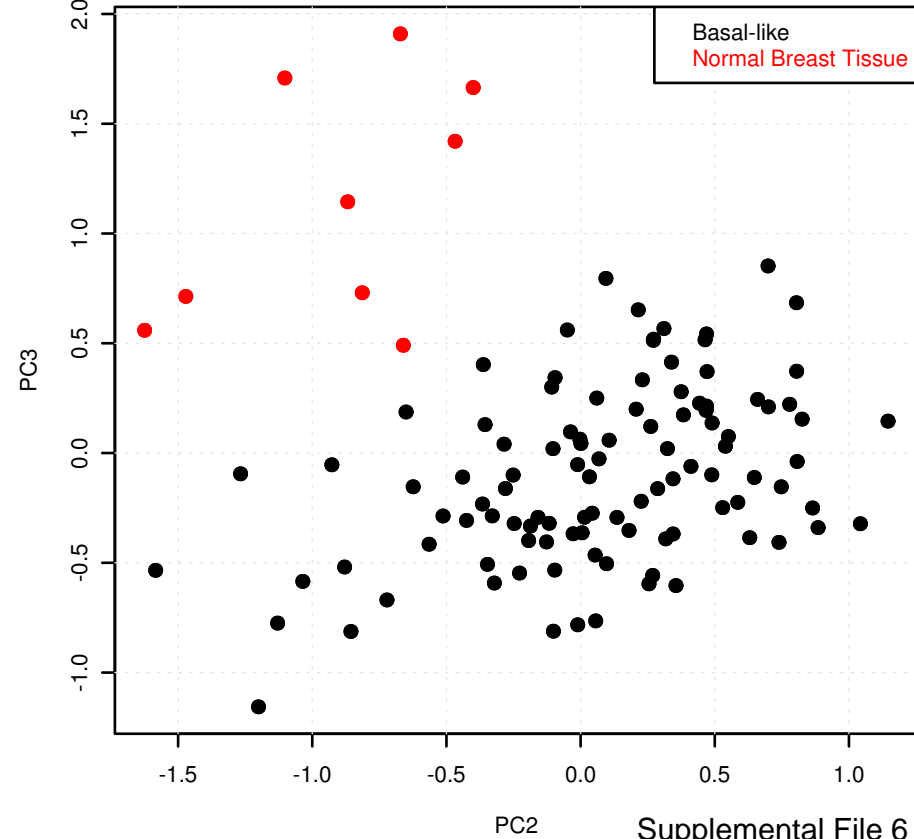

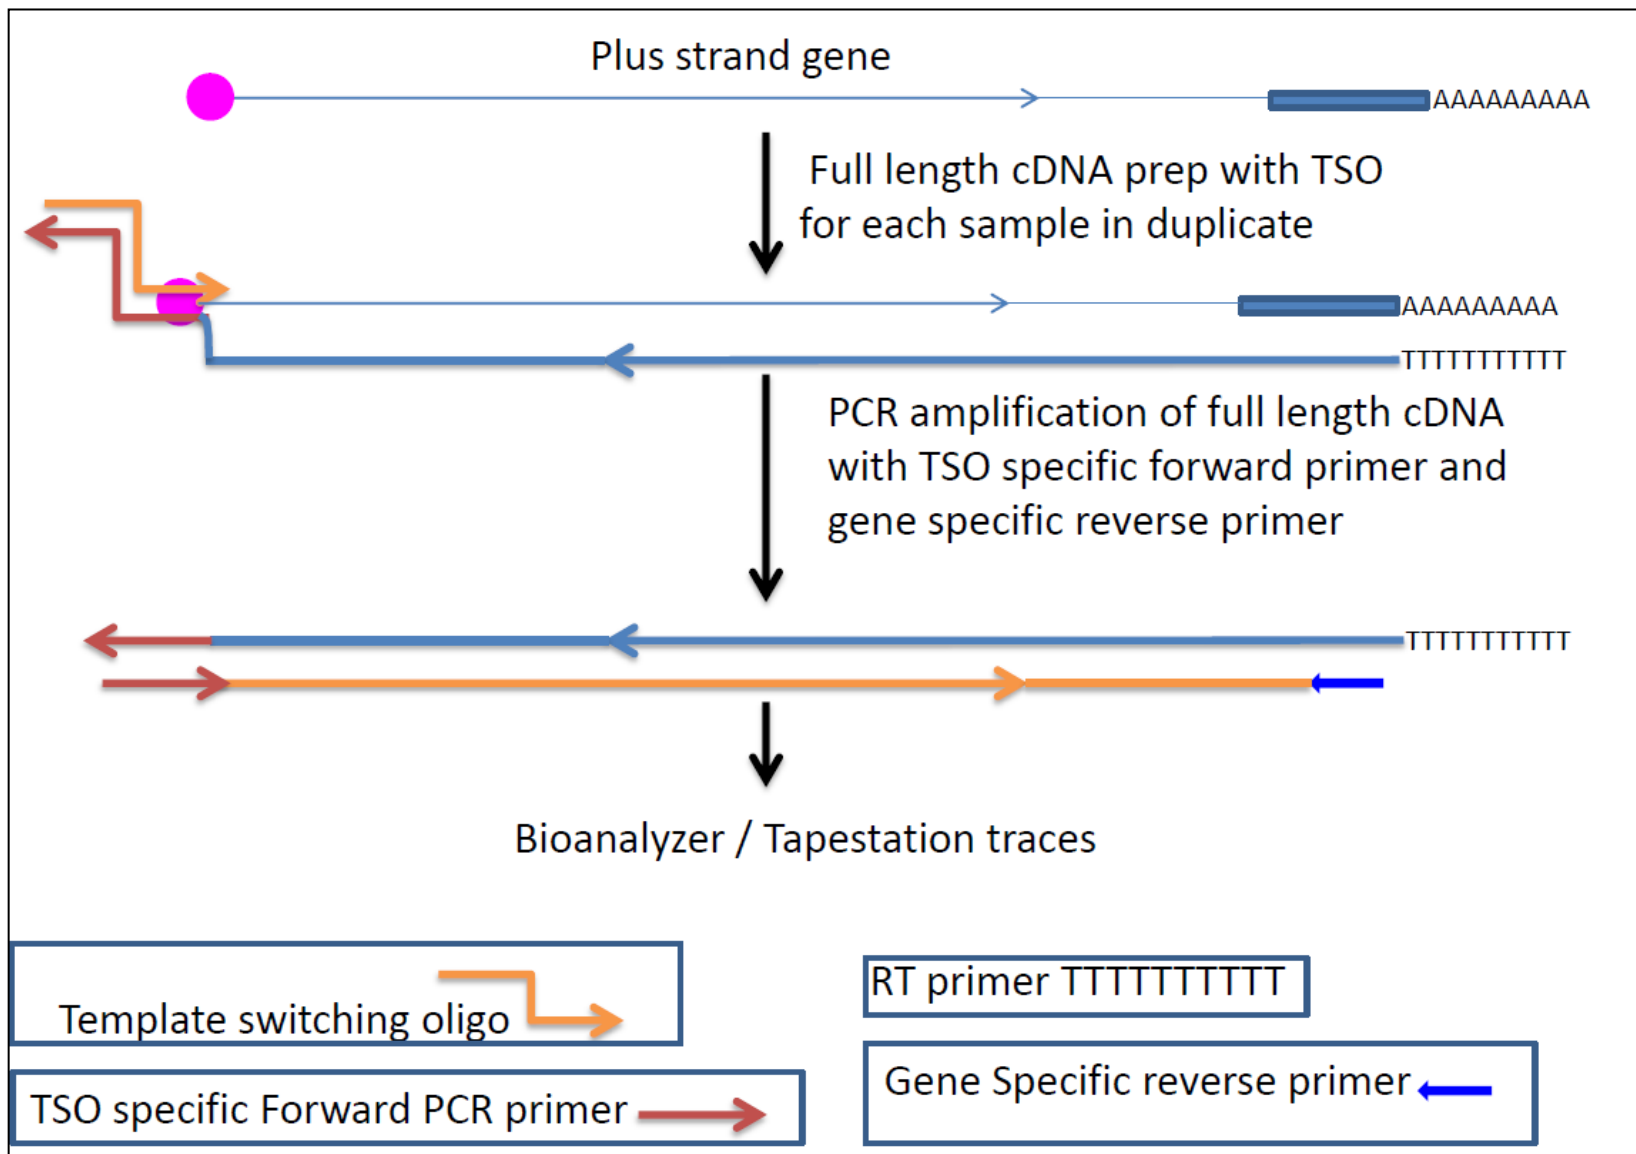

**Experimental protocol for generation of amplified full length cDNAs for all RNA isoforms of a given gene**



# AURKA

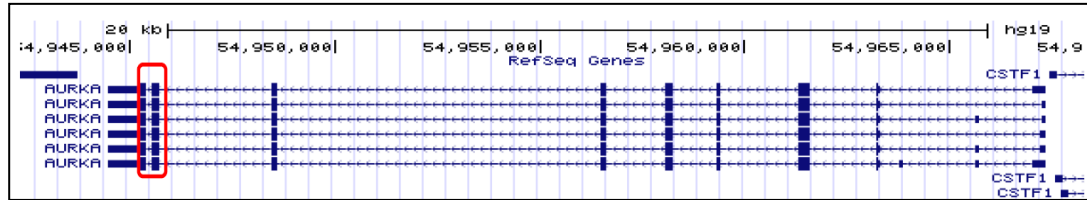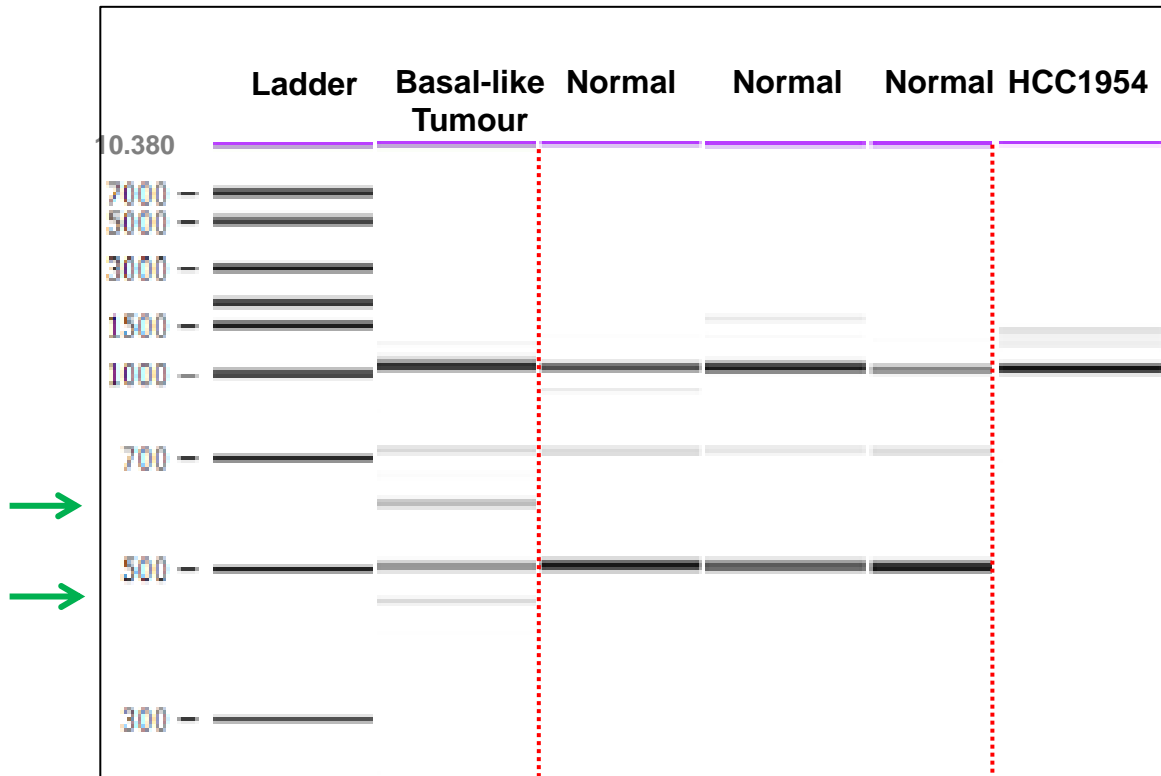

Gel-like pseudo-image obtained from Bioanalyzer analysis of amplified isoforms. Green arrows highlight isoforms differential expressed between basal-like tumours and normal samples

# AURKB

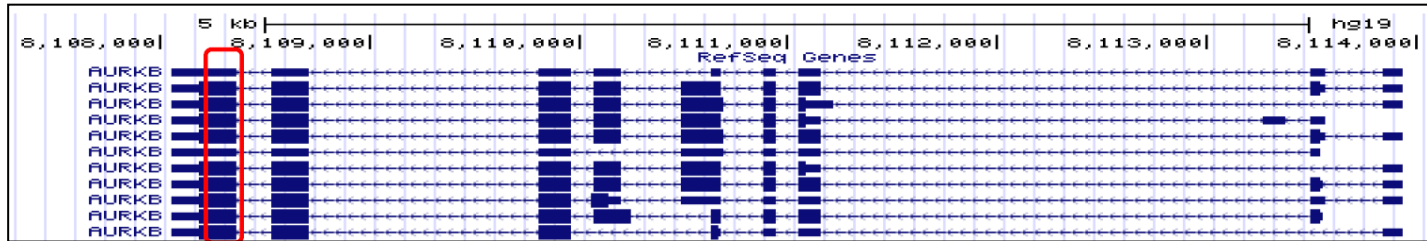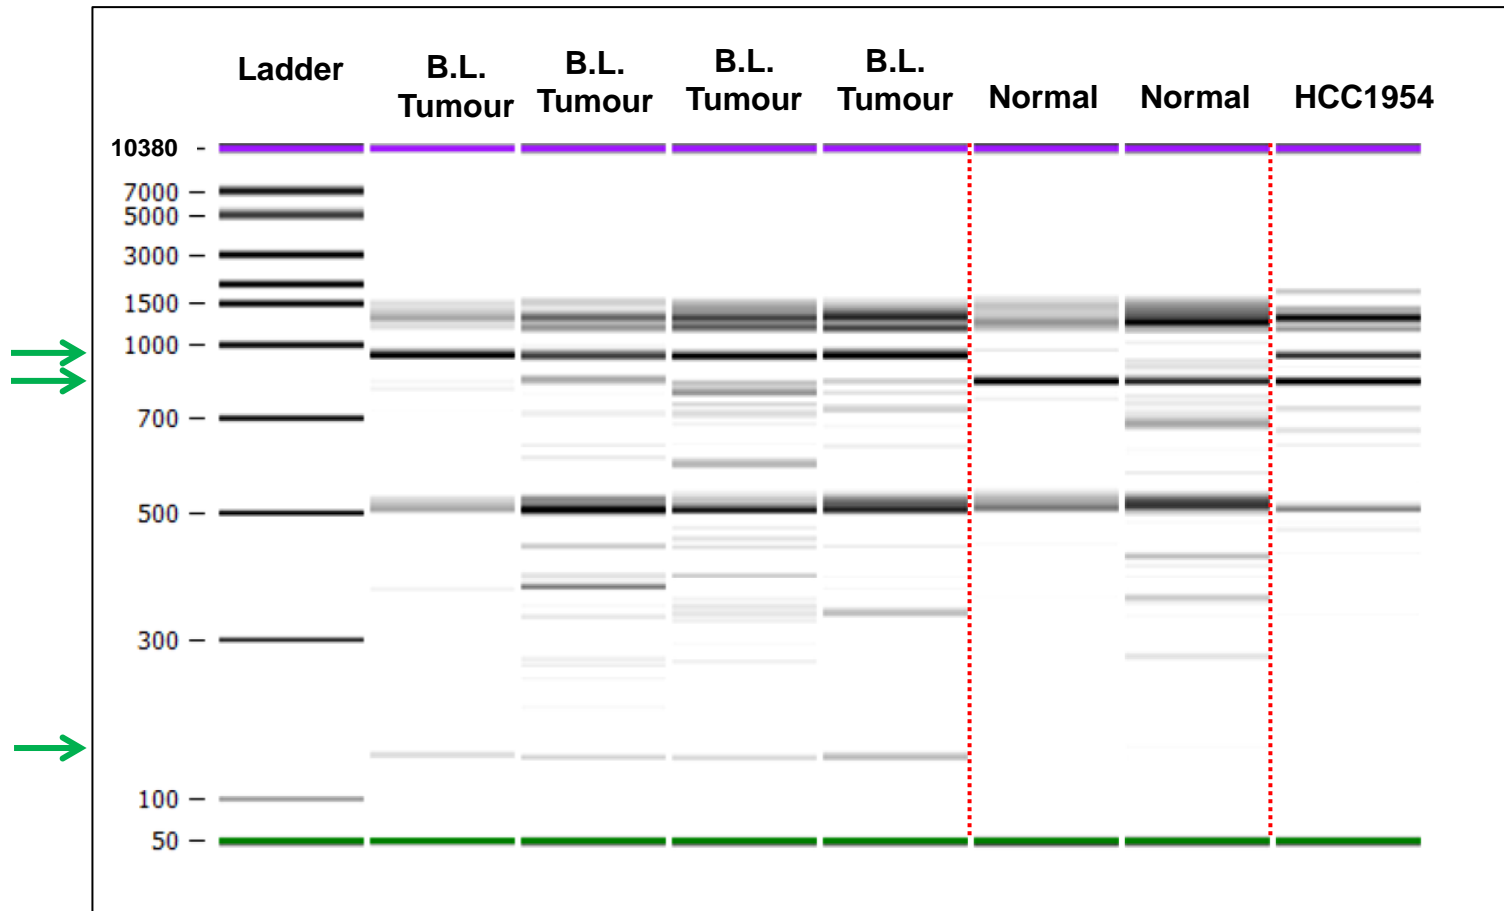

Gel-like pseudo-image obtained from Bioanalyzer analysis of amplified isoforms. Green arrows highlight isoforms differential expressed between basal-like tumours and normal samples

# BCL2- $\alpha$

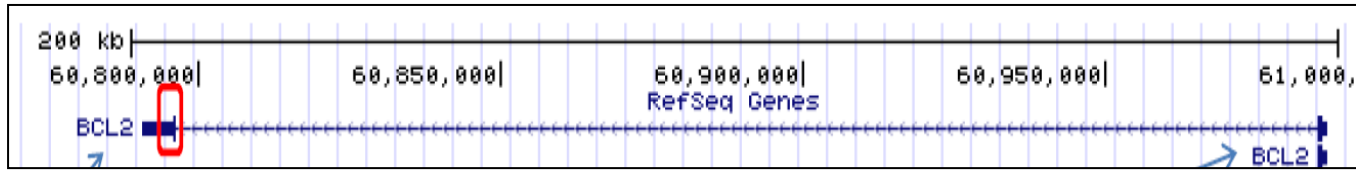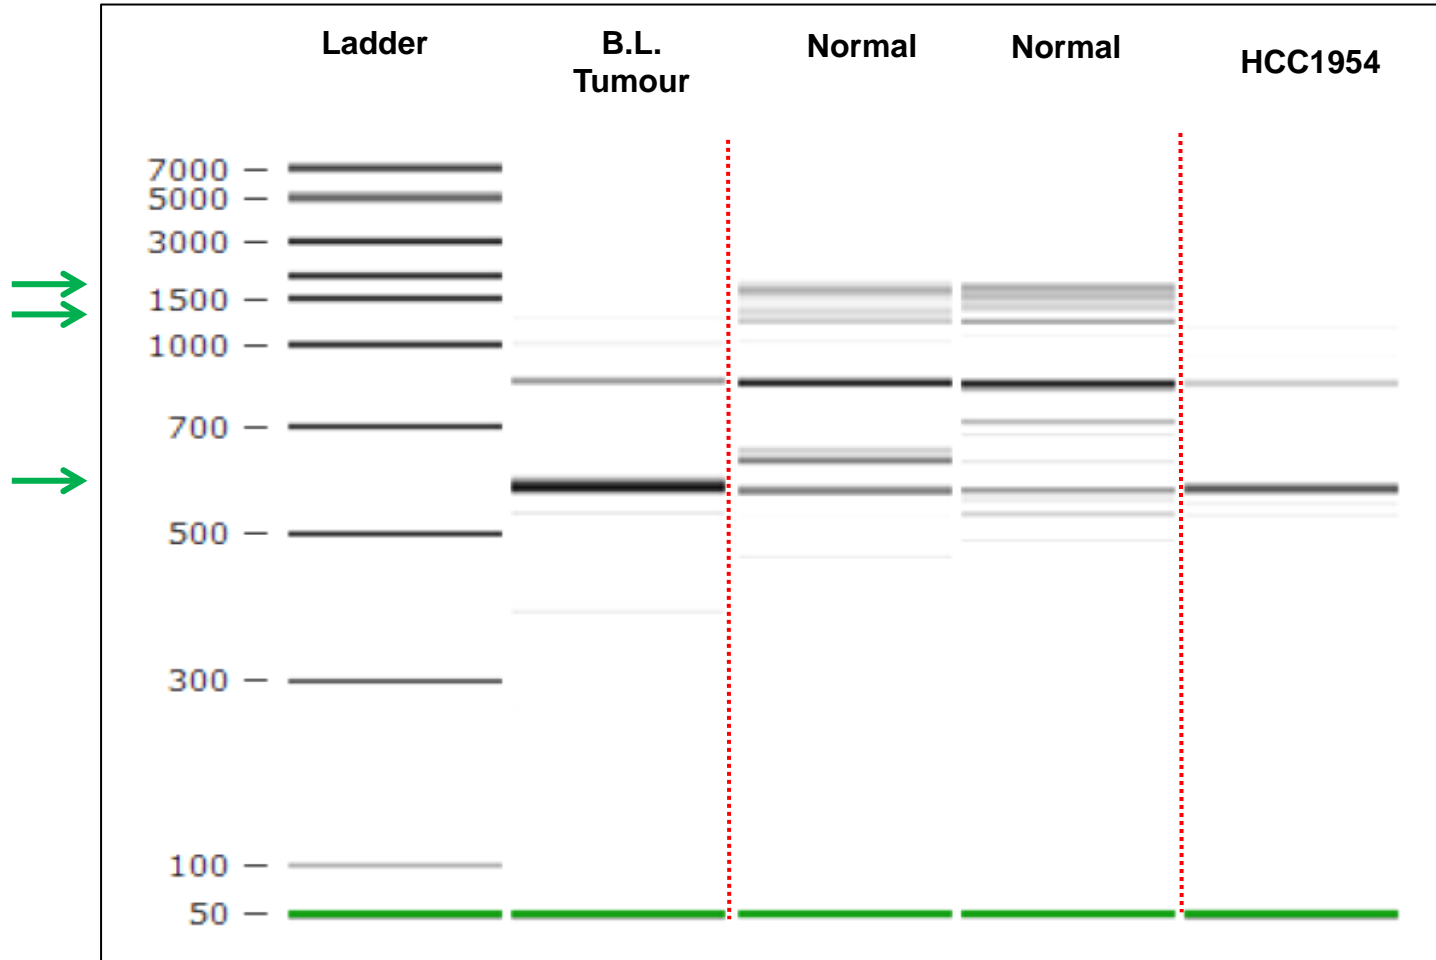

Gel-like pseudo-image obtained from Bioanalyzer analysis of amplified isoforms. Green arrows highlight isoforms differential expressed between basal-like tumours and normal samples

# NEK2

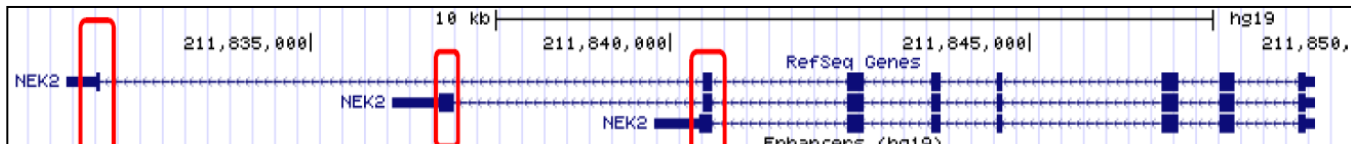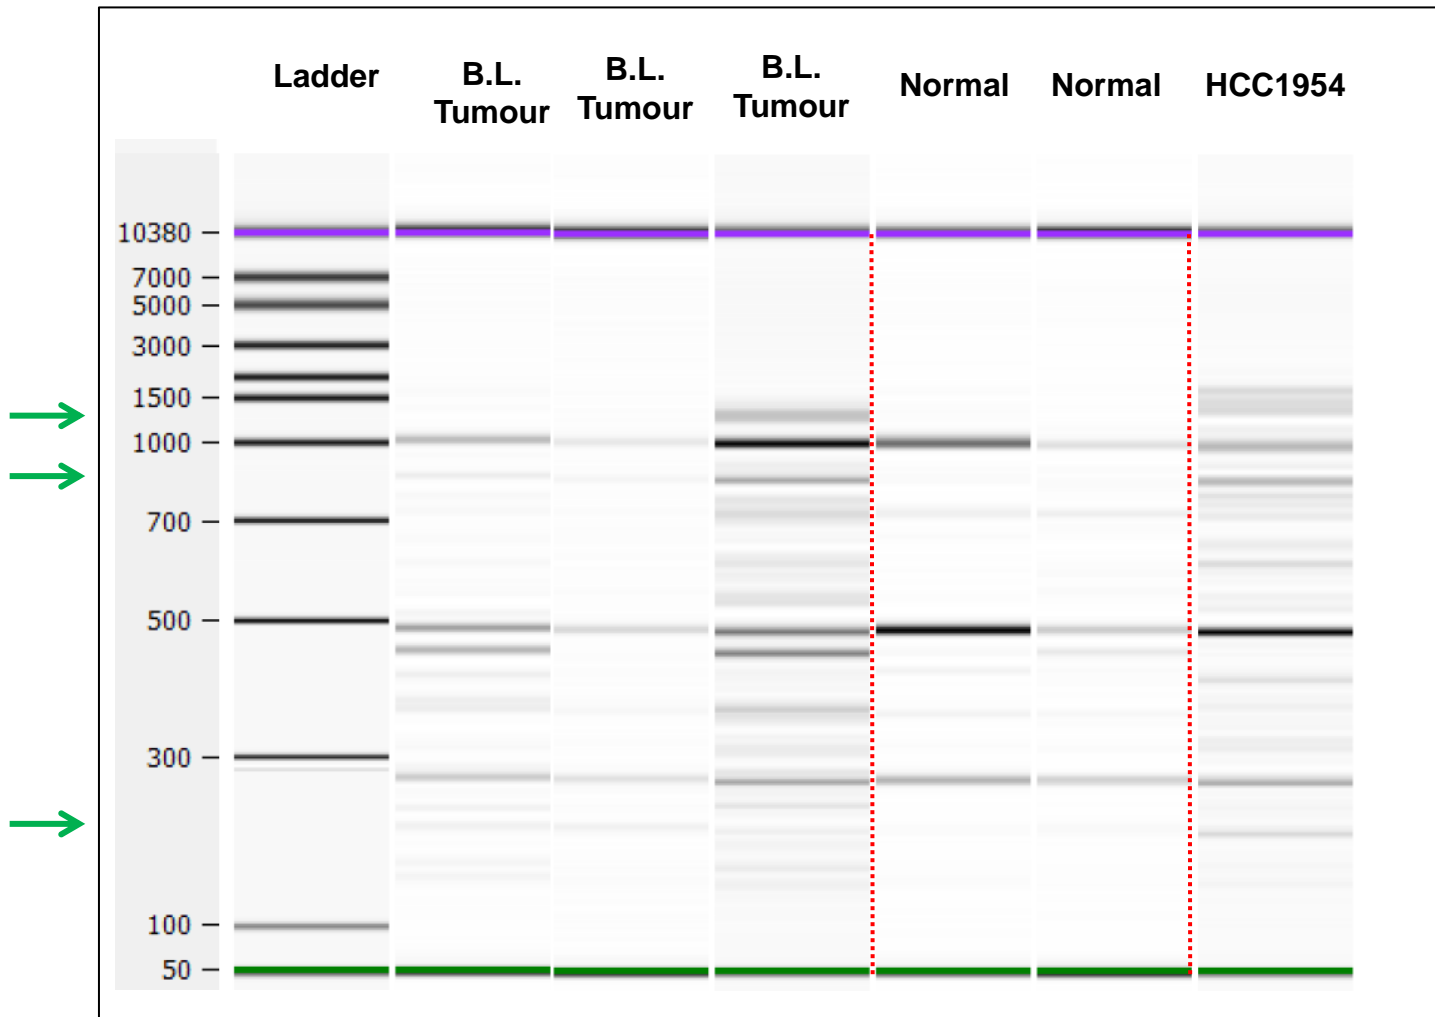

**Gel-like pseudo-image obtained from Bioanalyzer analysis of amplified isoforms. Green arrows highlight isoforms differential expressed between basal-like tumours and normal samples**

# RRM2

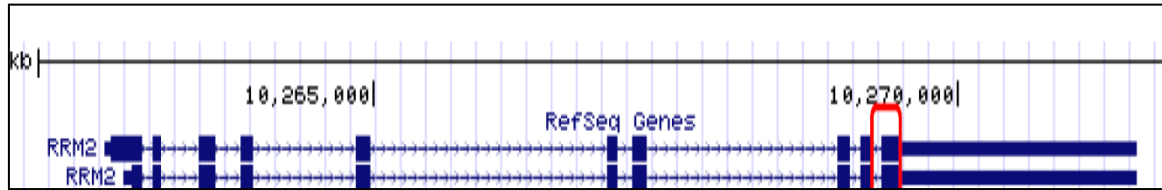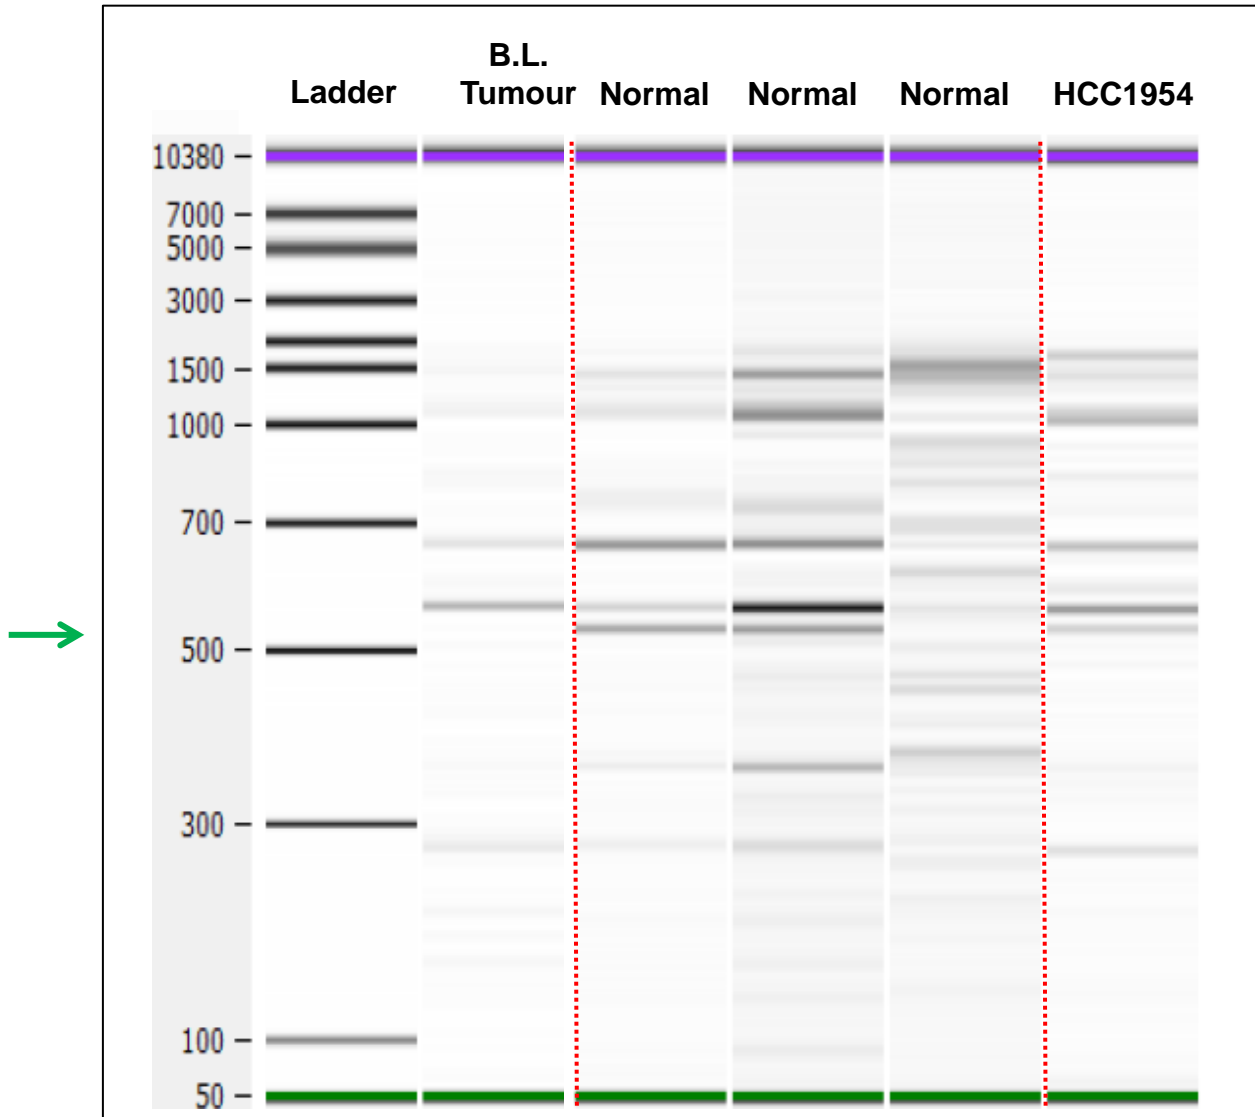

Gel-like pseudo-image obtained from Bioanalyzer analysis of amplified isoforms. Green arrows highlight isoforms differential expressed between basal-like tumours and normal samples

# TGFBR1

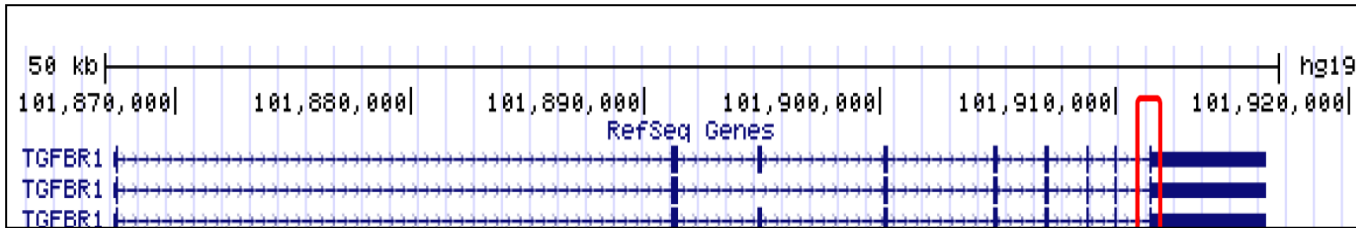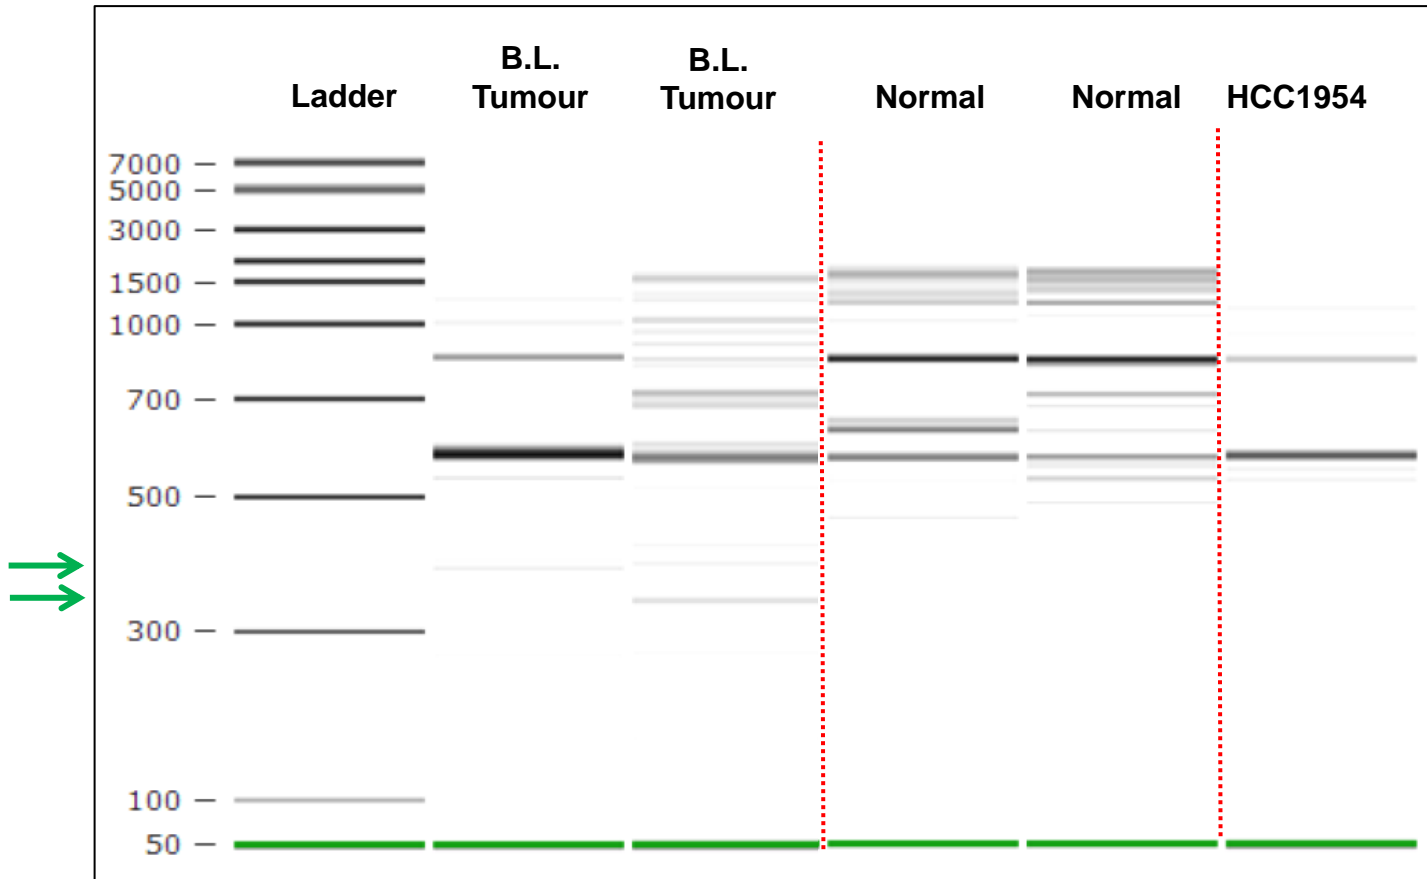

Gel-like pseudo-image obtained from Bioanalyzer analysis of amplified isoforms. Green arrows highlight isoforms differential expressed between basal-like tumours and normal samples

# UBE2C

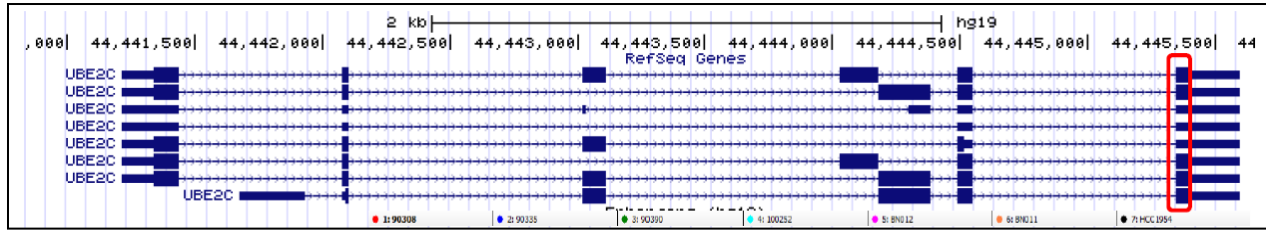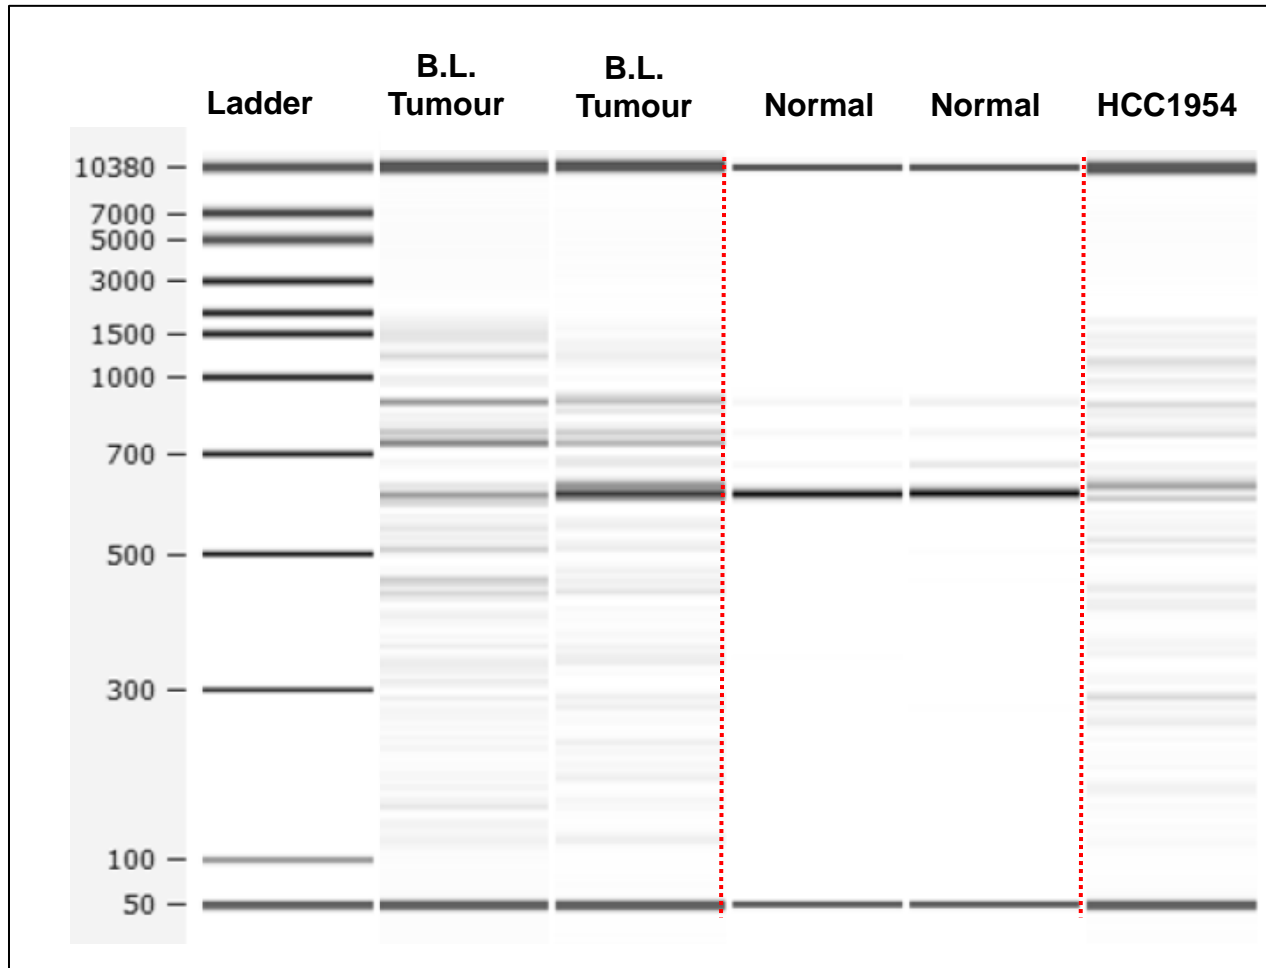

Gel-like pseudo-image obtained from Bioanalyzer analysis of amplified isoforms. Green arrows highlight isoforms differential expressed between basal-like tumours and normal samples

# ZBTB16

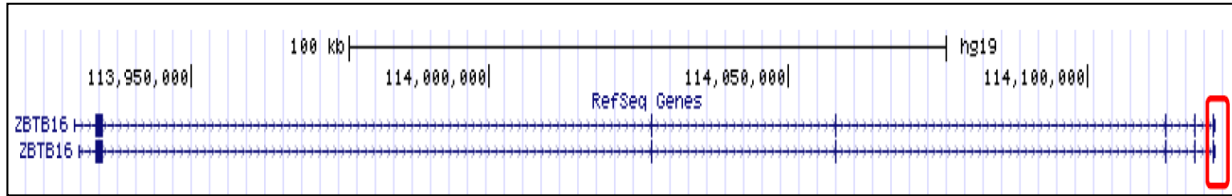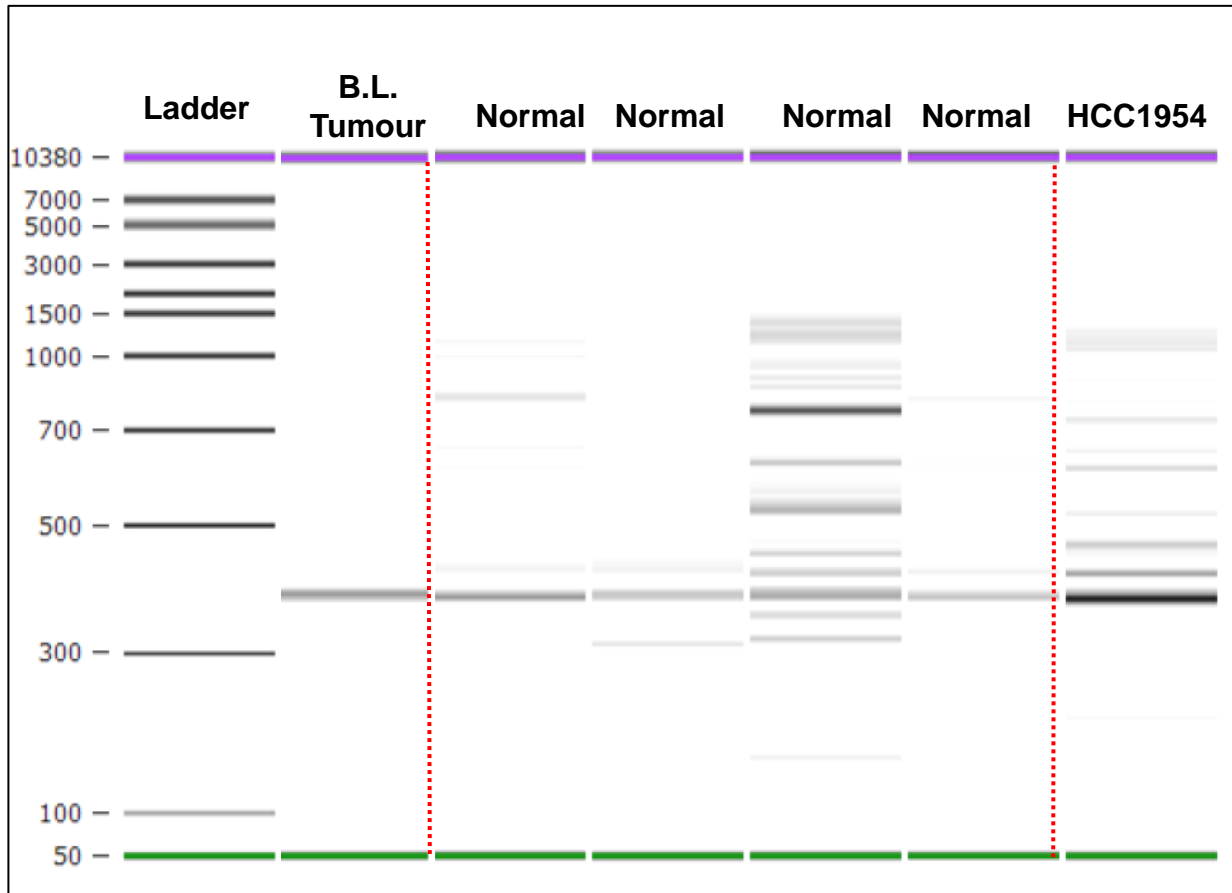

Gel-like pseudo-image obtained from Bioanalyzer analysis of amplified isoforms. Green arrows highlight isoforms differential expressed between basal-like tumours and normal samples



# CCR7

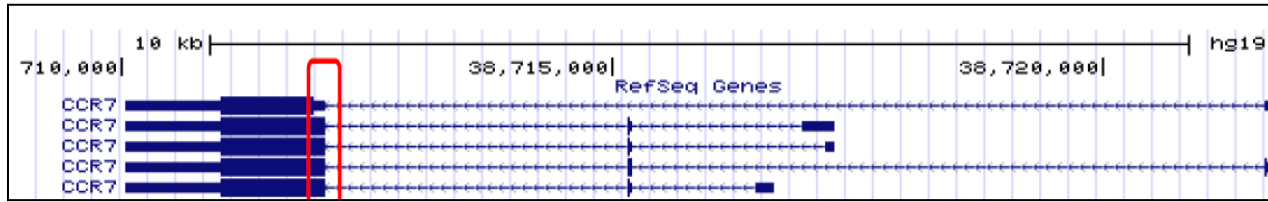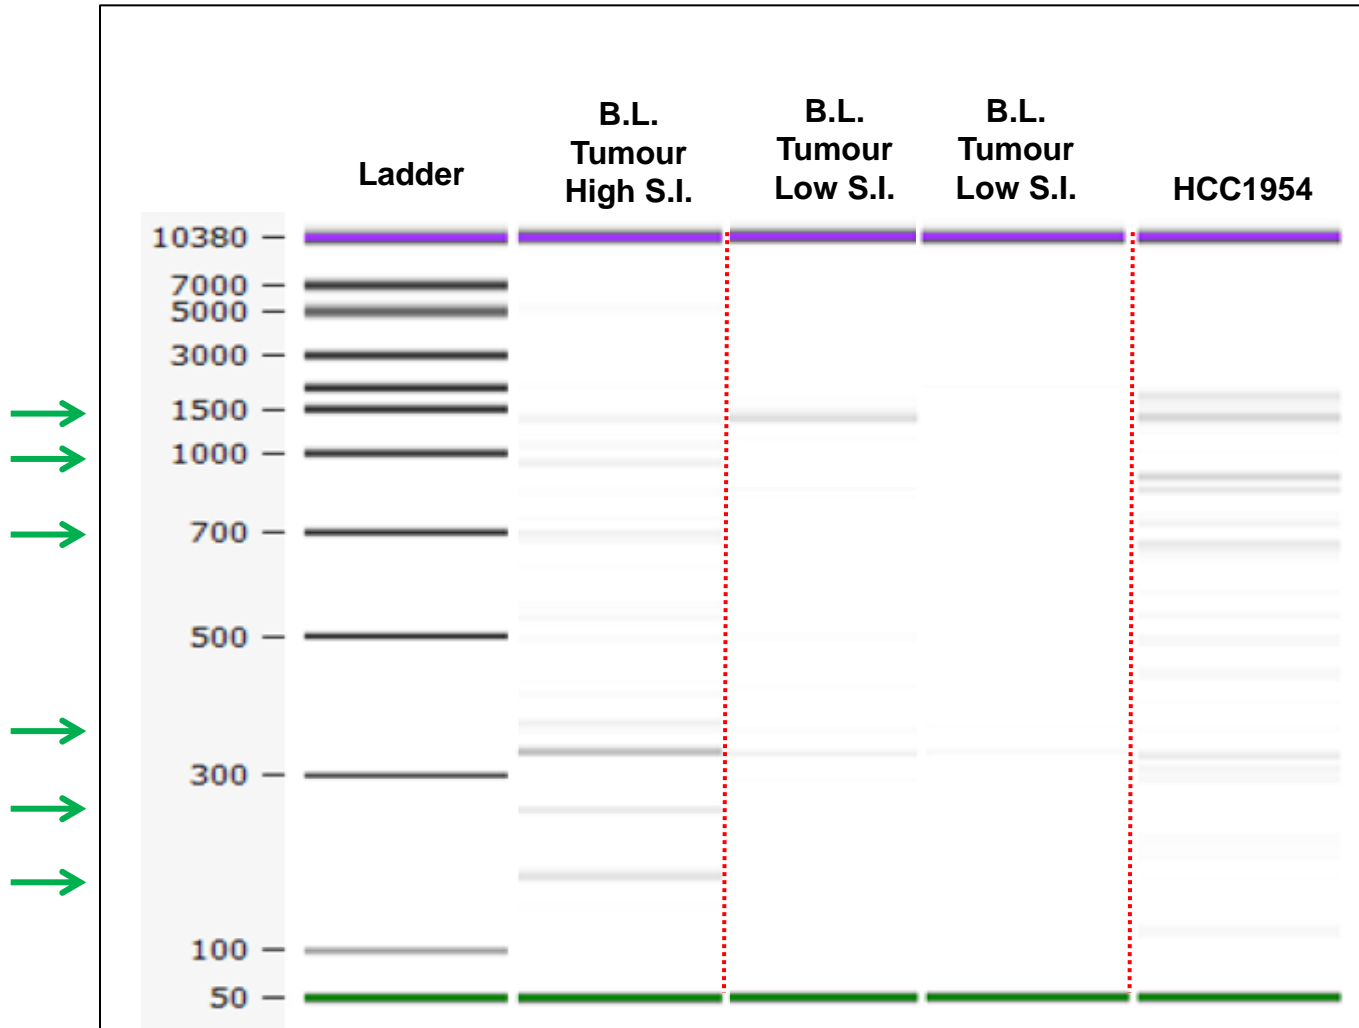

Gel-like pseudo-image obtained from Bioanalyzer analysis of amplified isoforms. Green arrows highlight isoforms differential expressed between basal-like tumours with respectively high and low splicing index

# Paxillin Signaling

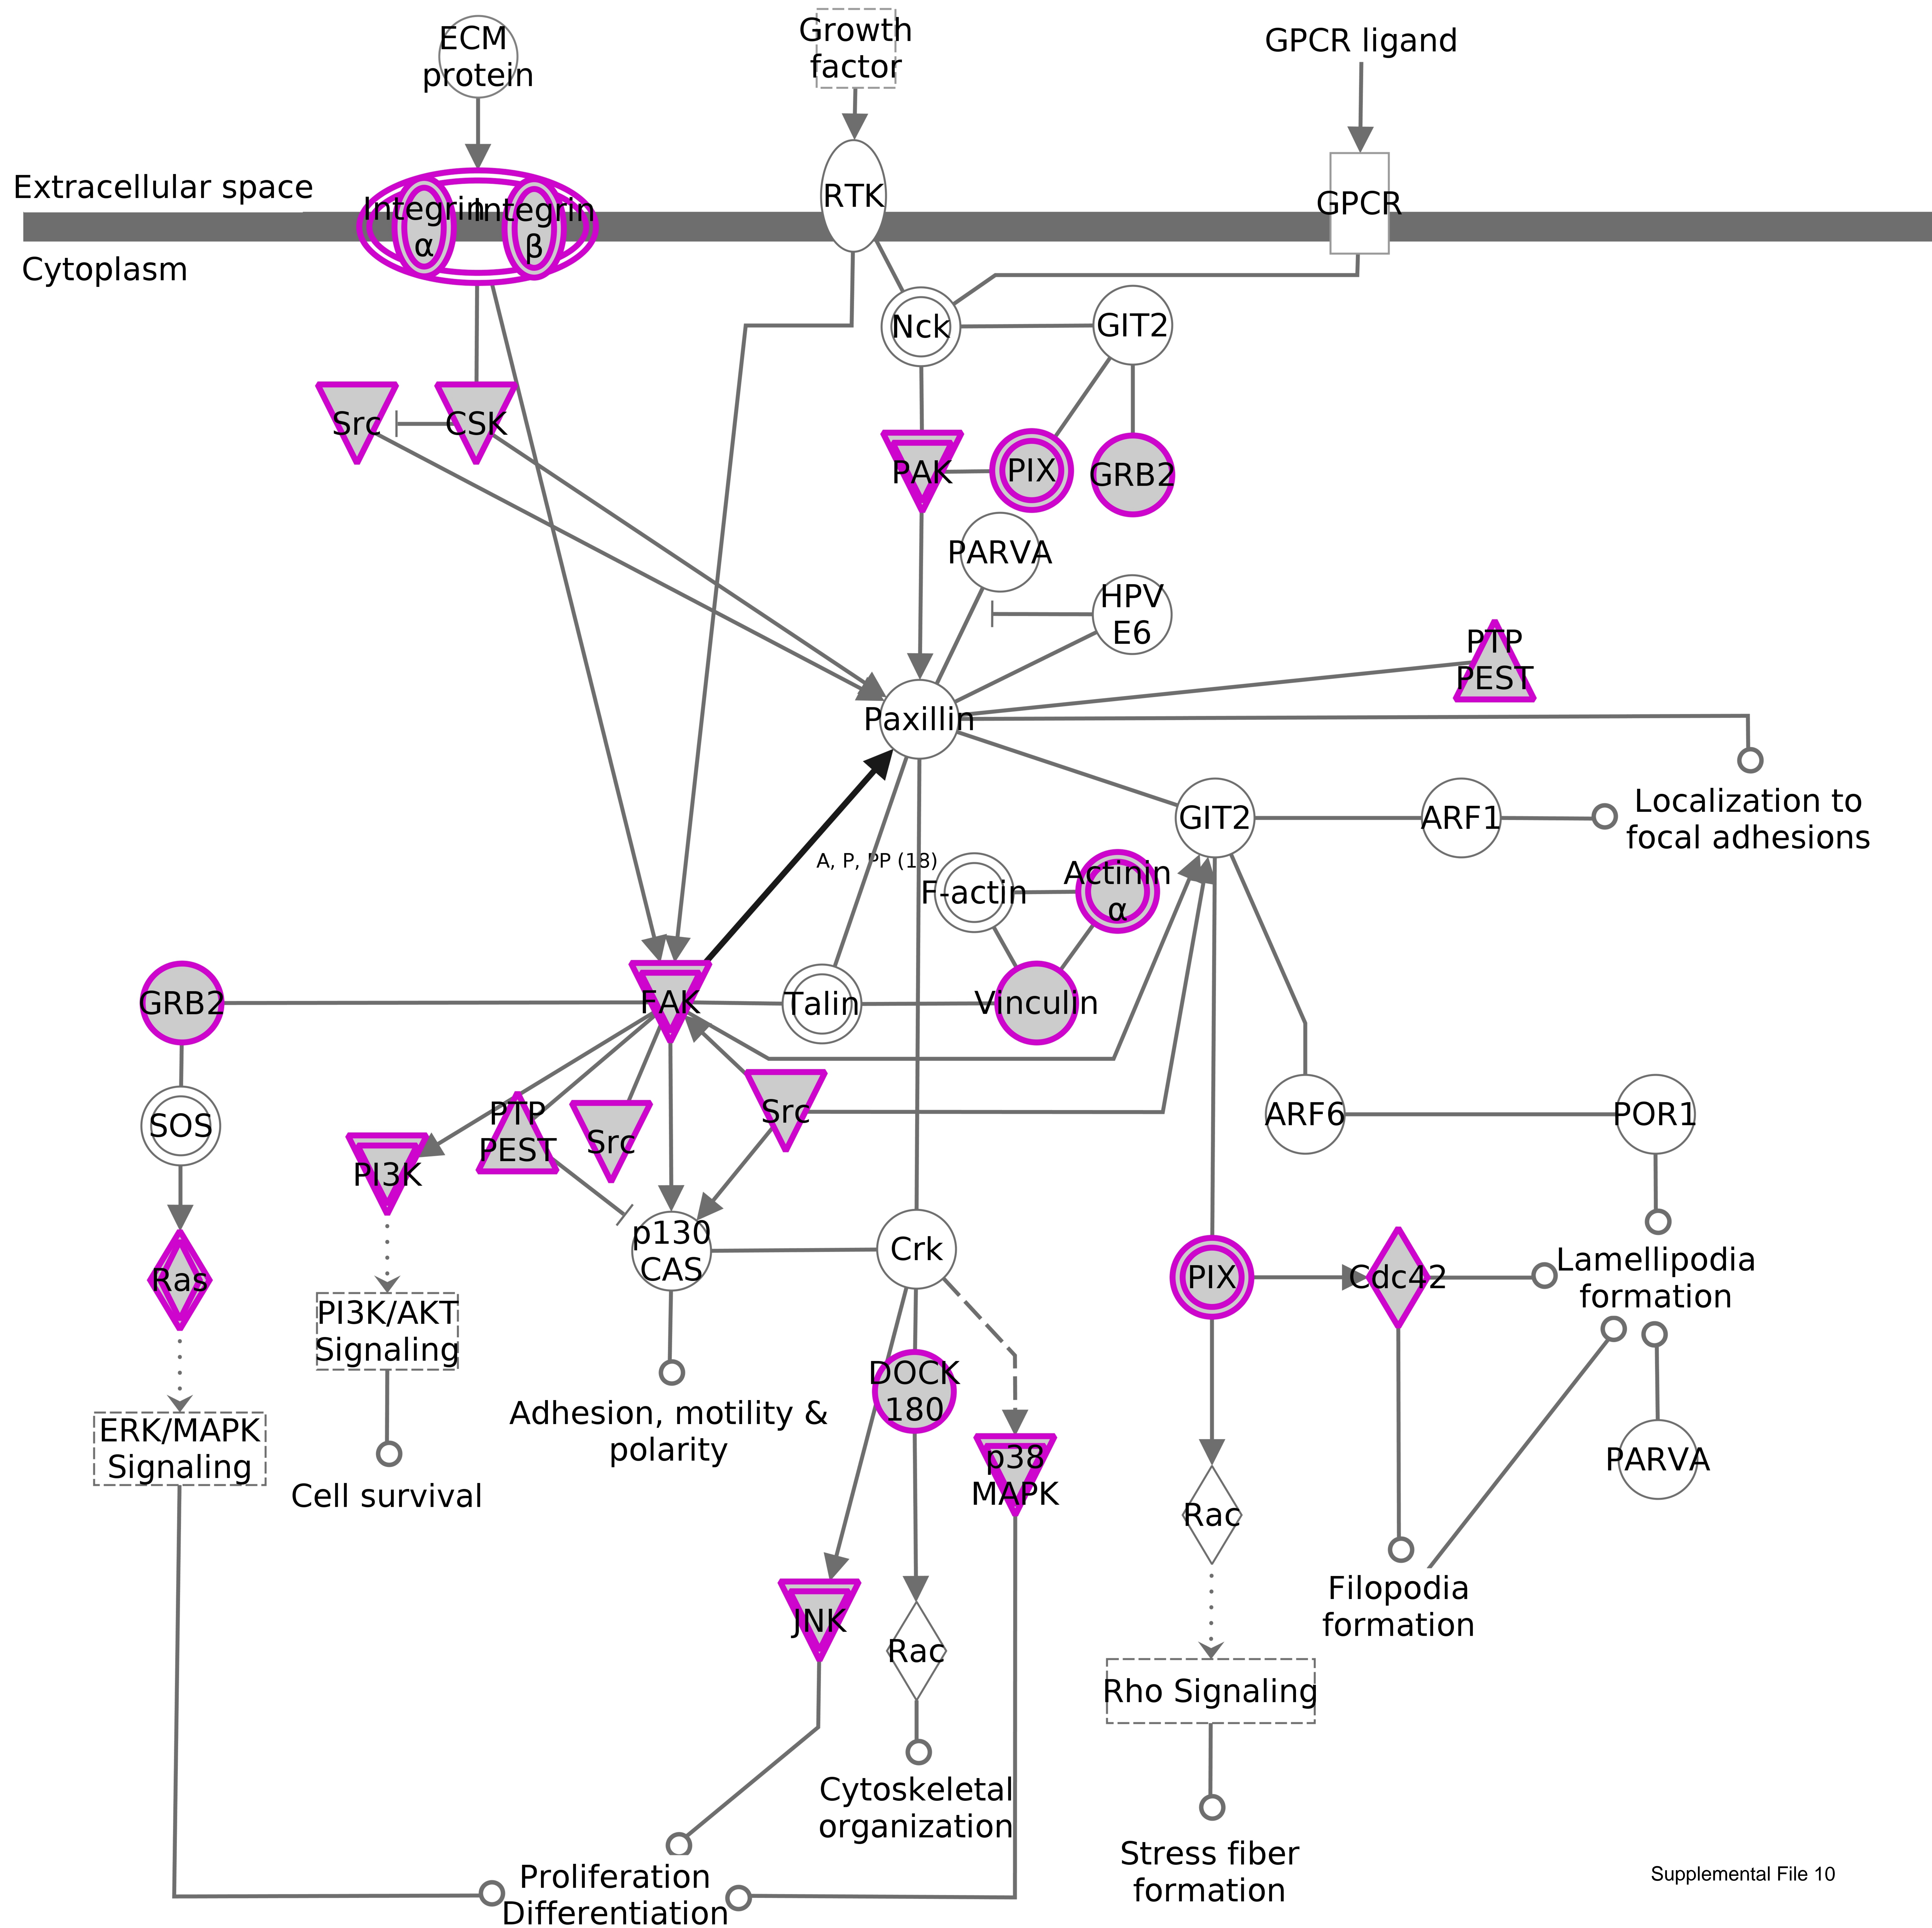





Gene Expression

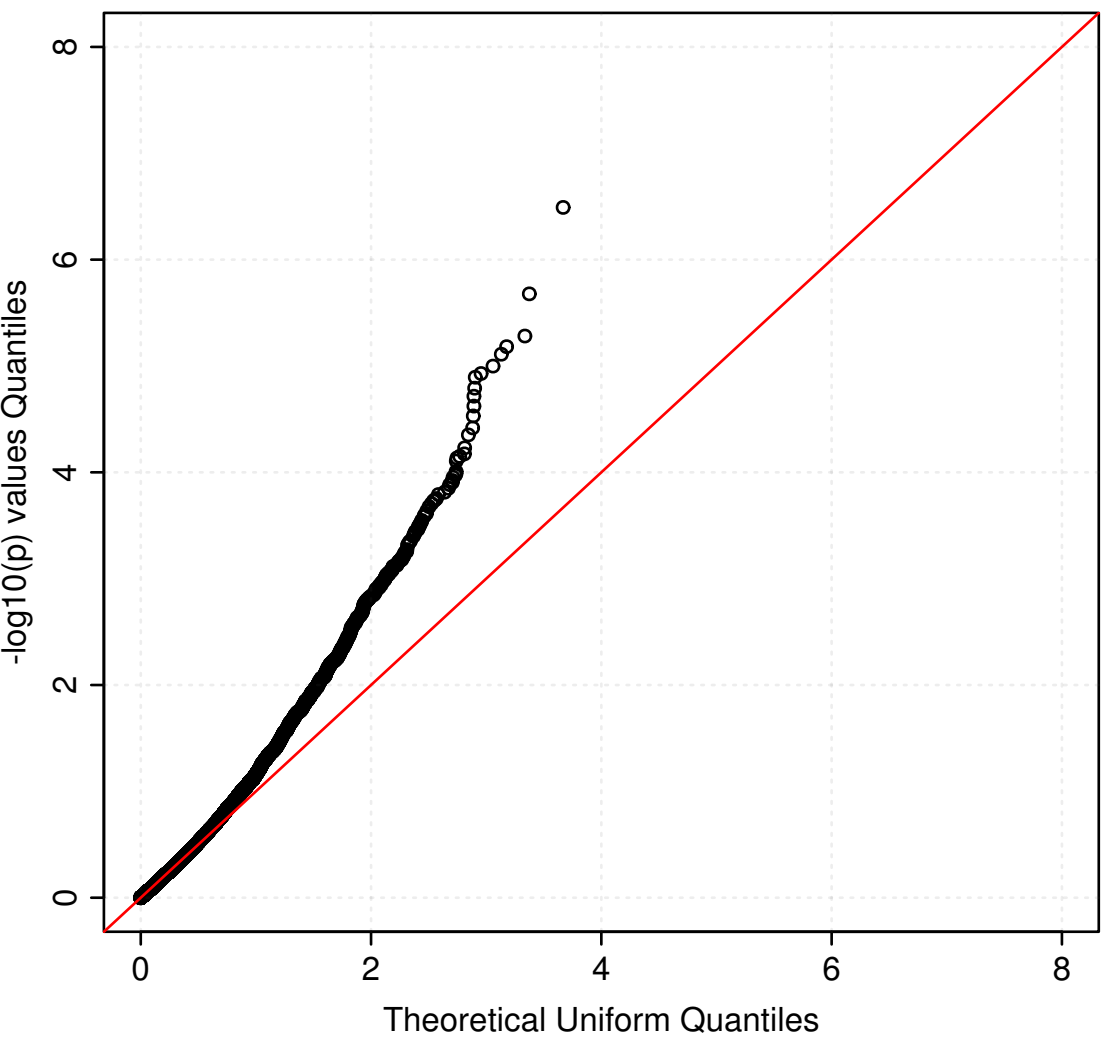

Exon Expression

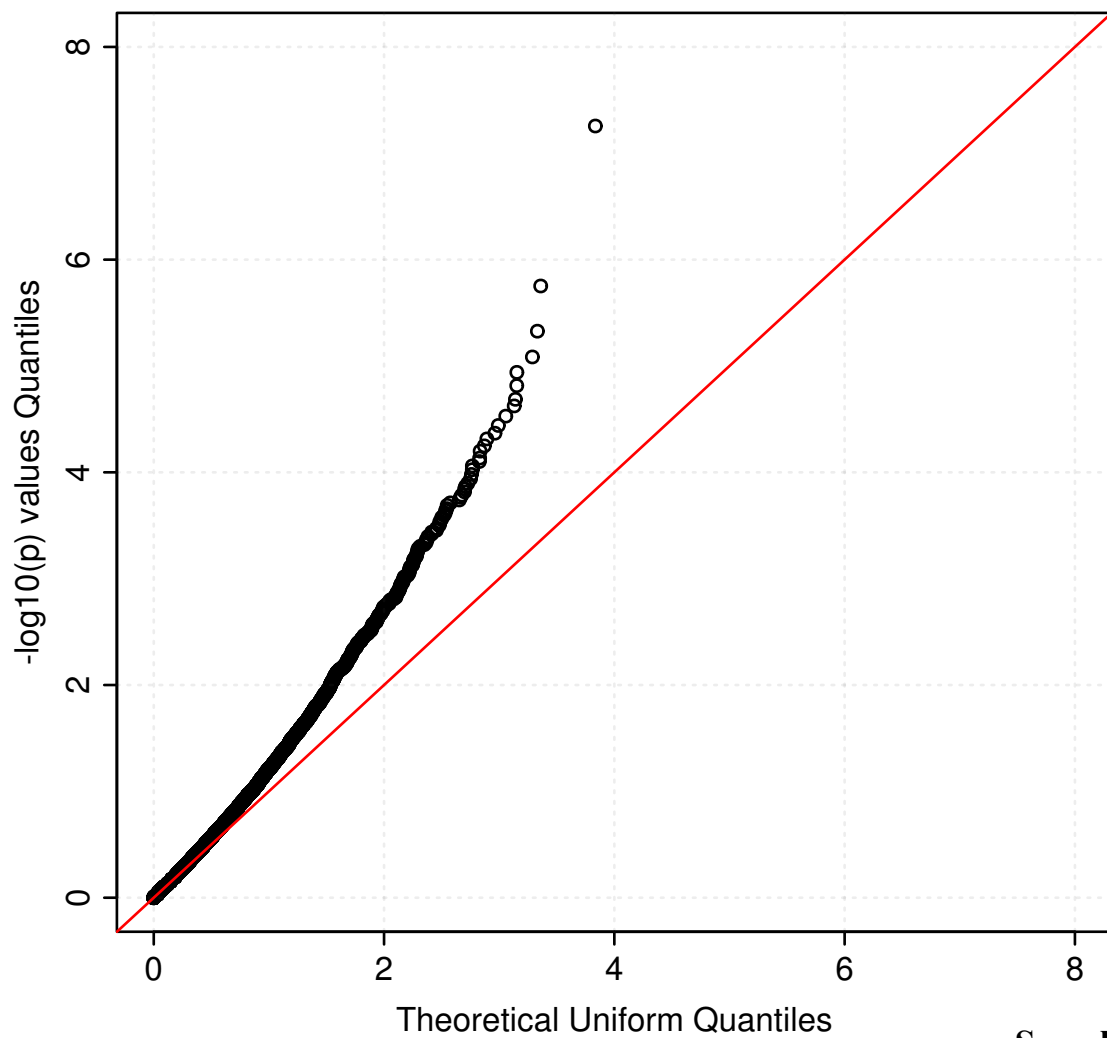

Splicing Index

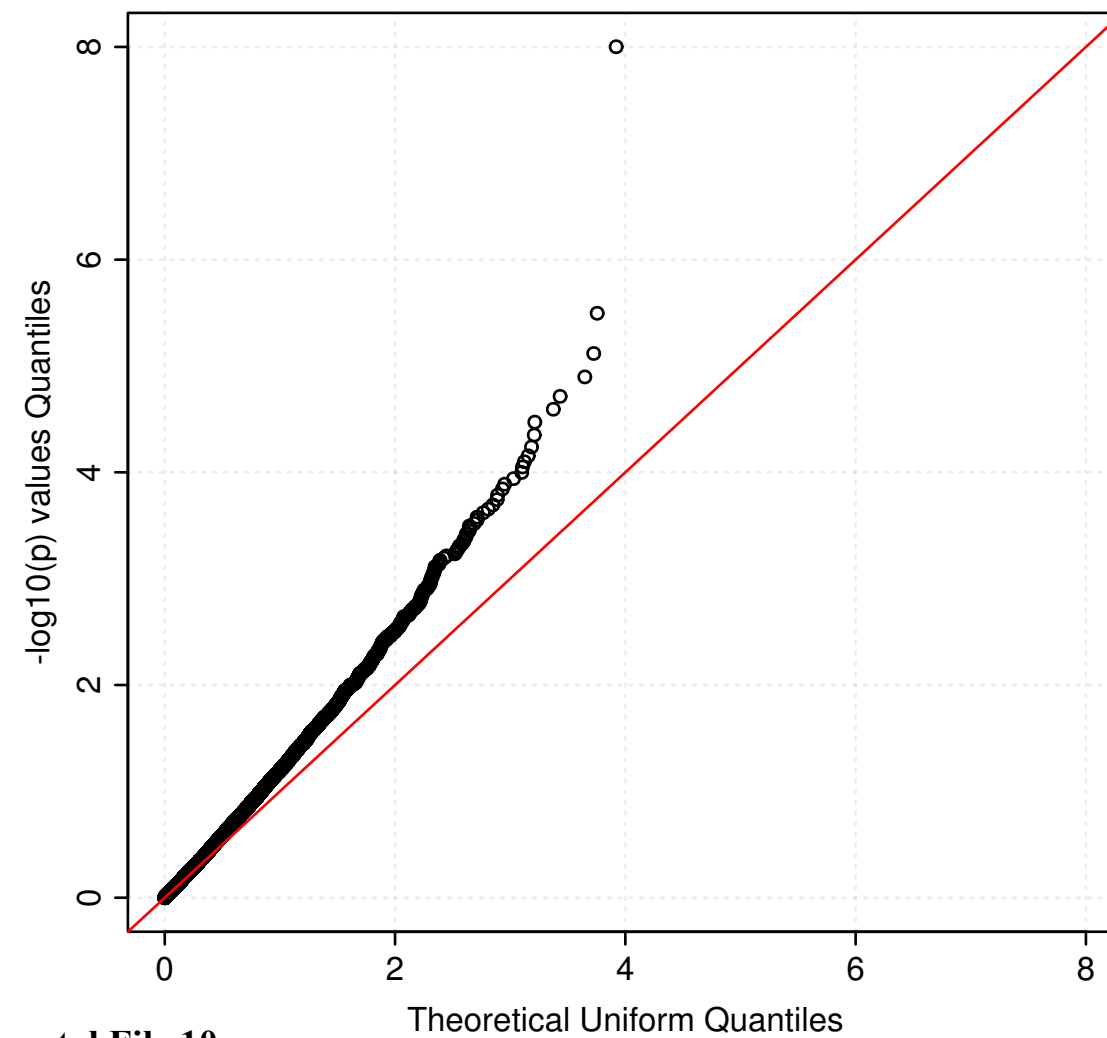

## Supplemental File 13

### **Validation of survival analysis results using external data sets**

To our knowledge, the only external dataset publically available with exon level results along with clinical outcome is the RNA-Seq dataset deposited in Tumor Cancer Genome Atlas (TCGA) (<http://cancergenome.nih.gov/>). This dataset encompasses 921 breast cancer samples annotated according with PAM50 subtype classification, of which 140 are annotated as basal-like,

Our plan was to first check concordance at gene-level, and then to proceed with the further validation comparison at exon- and splicing-index level.

We tried to validate our gene-level results by comparing genes whose overall expression was associated with prognosis in basal-like breast cancer in both data sets. We took prognostic genes in basal-like tumours from our data set (204 genes having  $q\text{-val} < 0.1$ ) and compared them with an equivalent number of genes with lowest p-values for association to prognosis from the TCGA data set (to be noticed that none of the TCGA genes passed the threshold of  $q\text{-value} < 0.1$ ). Surprisingly, none of our prognostic genes was found in the list of TCGA genes.

To understand these results, we then explored further the TCGA dataset and run survival analyses across all PAM50 subtypes. As a result, we found that in this data set the basal-like subtype does not show up as the most aggressive subtype, in overt contrast with all previous results published on the same subject [1-3]. Even more puzzling was the observation that the subtype with the worst prognosis is the Normal-like one (see Figure below).

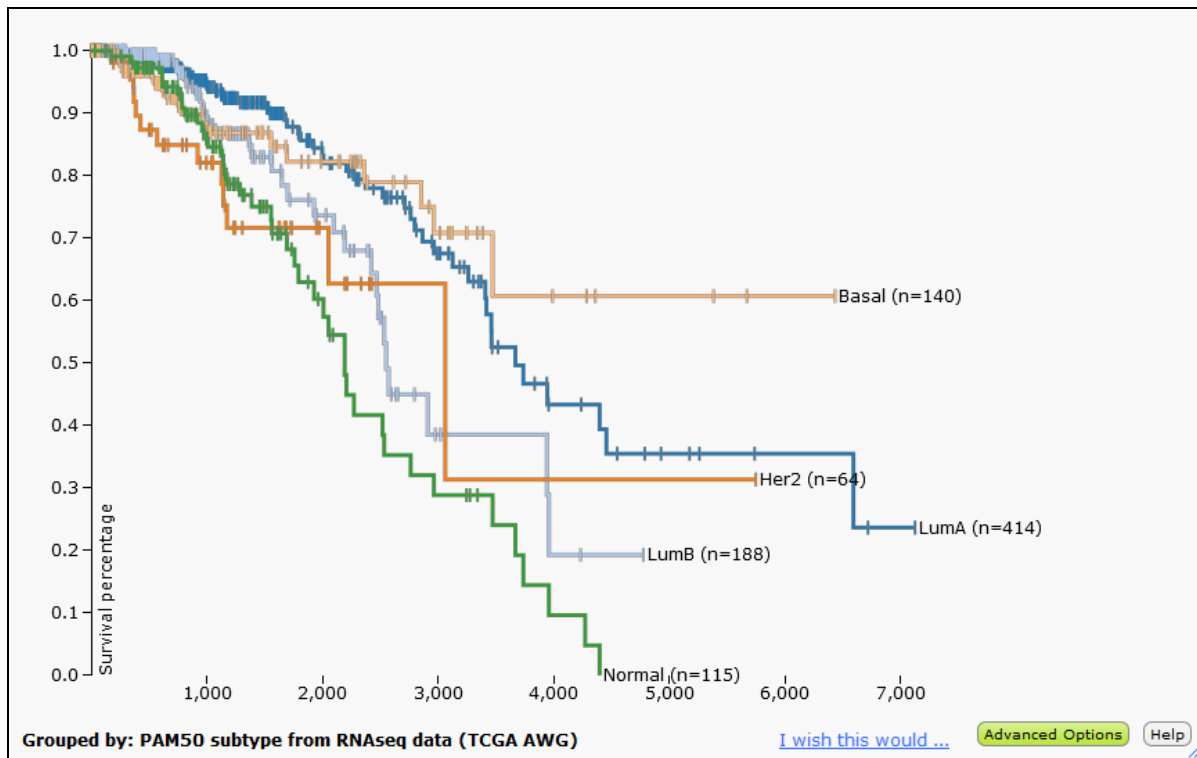

**Survival analysis of TCGA dataset.** Kaplan-Meier survival curves of breast cancer samples from the TCGA breast cancer RNA-Seq based database (UCSC browser was used for the analysis)

An additional observation was that if we take the list of genes with lowest p-values for association with prognosis from TCGA, this list is not enriched for immune related genes, as we observed in our data set and as it should be expected from recent literature, showing that immune infiltration is the among the most important prognostic factors in basal-like and triple-negative breast cancers. On these bases we came to the conclusion that the survival data of the TCGA dataset present remarkable divergences from the majority of other data sets in the field [9], and that this probably explains the reasons for lack of convergence with our results. Based on these observations, it came by no surprise that also the exon-level results (EE and SI associated to prognosis) when compared between our and TCGA-based analyses present no overlap.

We therefore moved to the comparison with another public resource, accessible on-line (<http://kmpplot.com/analysis/>). [10]. This database, here referred to as the KMP DB, is the largest public resource of standard Affymetrix-based gene expression data and clinical information from breast cancer, extracted from a large number of publically available studies (from GEO, TCGA and EGA). It encompasses data from 4,142 breast tumours, 54,675 Affymetrix probe set IDs and 70,632 gene symbols.

Out of the 204 genes associated with basal-like prognosis in our dataset ( $q\text{-val} < 0.1$ ), 168 (83%) had  $q\text{-val} < 0.1$  in the KMP database (Fisher-test p-value of the overlap  $< 10^{-20}$ ). As a negative control, when we took the 204 genes with lowest association with prognosis from our dataset, only 25% had a  $q\text{-value} < 0.1$  in the KMP database.

We went on with the comparison of the list of highest and lowest genes associated with prognosis from the TCGA data set and those associated with prognosis in the KMP database, and we found a very limited overlap (30%). This was not significantly different from the overlap between the 204 genes with lowest association with prognosis from TCGA, used as a negative control (19%) (see Figure below).

In summary:

1. Gene-level comparison with the only data set publically available comprising exon-level expression and clinical level information (TCGA RNA-Seq breast cancer) showed no concordance. This data set presented remarkable deviations with respect to survival analysis from what expected from other published literature and data sets.
2. Conversely, gene-level comparison with the largest existing resource of standard Affymetrix-based gene expression data and clinical information – KMP – provided striking confirmation of our gene-level results of survival associated genes.
3. TCGA gene-level prognostic results were not overlapping with KMP-based ones, pointing again to the fact that this data presents peculiar survival features when compared to other published data sets.

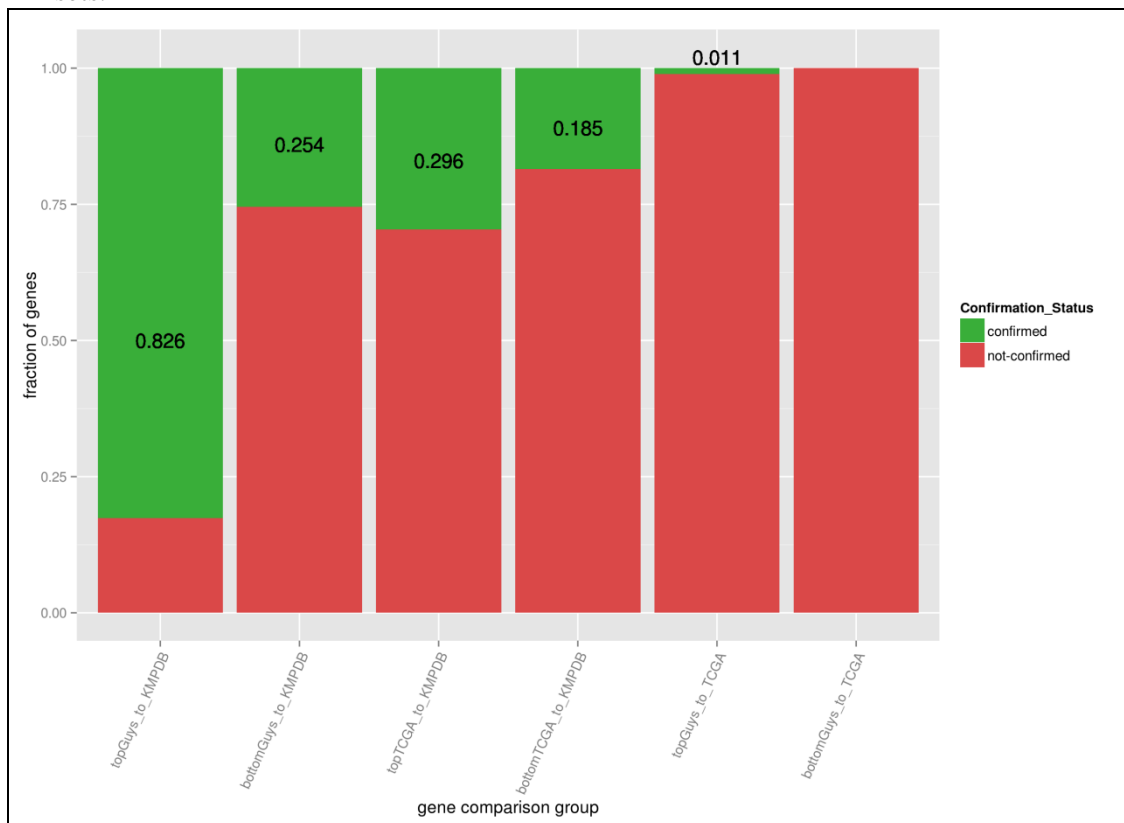

**Comparison between basal-like breast cancer prognostic genes resulting from the analysis of our data set (Guy's), and two independent datasets (TCGA and KMP data sets).** Each bar represents the fraction of genes identified as associated with survival in one dataset and checked in the second data set. From each database, q-value < 0.1 was set as a threshold for association with survival (Benjamini-Hochberg corrected p-value for multiple testing). Green and red colours respectively indicate presence confirmed and not-confirmed. From left to right: i) basal-like prognostic genes identified in Guy's and checked in KMPDB ii) basal-like non-prognostic genes identified in Guy's and checked in KMPDB iii) basal-like prognostic genes identified in TCGA and checked in KMPDB iv) basal-like non-prognostic genes identified in TCGA and checked in KMPDB v) basal-like prognostic genes identified in Guy's and checked in TCGA vi) basal-like non-prognostic genes identified in Guy's and checked in TCGA.

1. Sorlie T, Tibshirani R, Parker J, Hastie T, Marron JS, Nobel A, Deng S, Johnsen H, Pesich R, Geisler S *et al*: **Repeated observation of breast tumor subtypes in independent gene**



- expression data sets.** *Proceedings of the National Academy of Sciences of the United States of America* 2003, **100**(14):8418-8423.
2. Hu Z, Fan C, Oh DS, Marron JS, He X, Qaqish BF, Livasy C, Carey LA, Reynolds E, Dressler L *et al*: **The molecular portraits of breast tumors are conserved across microarray platforms.** *BMC Genomics* 2006, **7**:96.
  3. Parker JS, Mullins M, Cheang MC, Leung S, Voduc D, Vickery T, Davies S, Fauron C, He X, Hu Z *et al*: **Supervised risk predictor of breast cancer based on intrinsic subtypes.** *J Clin Oncol* 2009, **27**(8):1160-1167.
  4. Ignatiadis M, Singhal SK, Desmedt C, Haibe-Kains B, Criscitiello C, Andre F, Loi S, Piccart M, Michiels S, Sotiriou C: **Gene modules and response to neoadjuvant chemotherapy in breast cancer subtypes: a pooled analysis.** *J Clin Oncol* 2012, **30**(16):1996-2004.
  5. Szasz AM, Lanczky A, Nagy A, Forster S, Hark K, Green JE, Boussioutas A, Busuttil R, Szabo A, Gyorffy B: **Cross-validation of survival associated biomarkers in gastric cancer using transcriptomic data of 1,065 patients.** *Oncotarget* 2016.

# CYFIP2

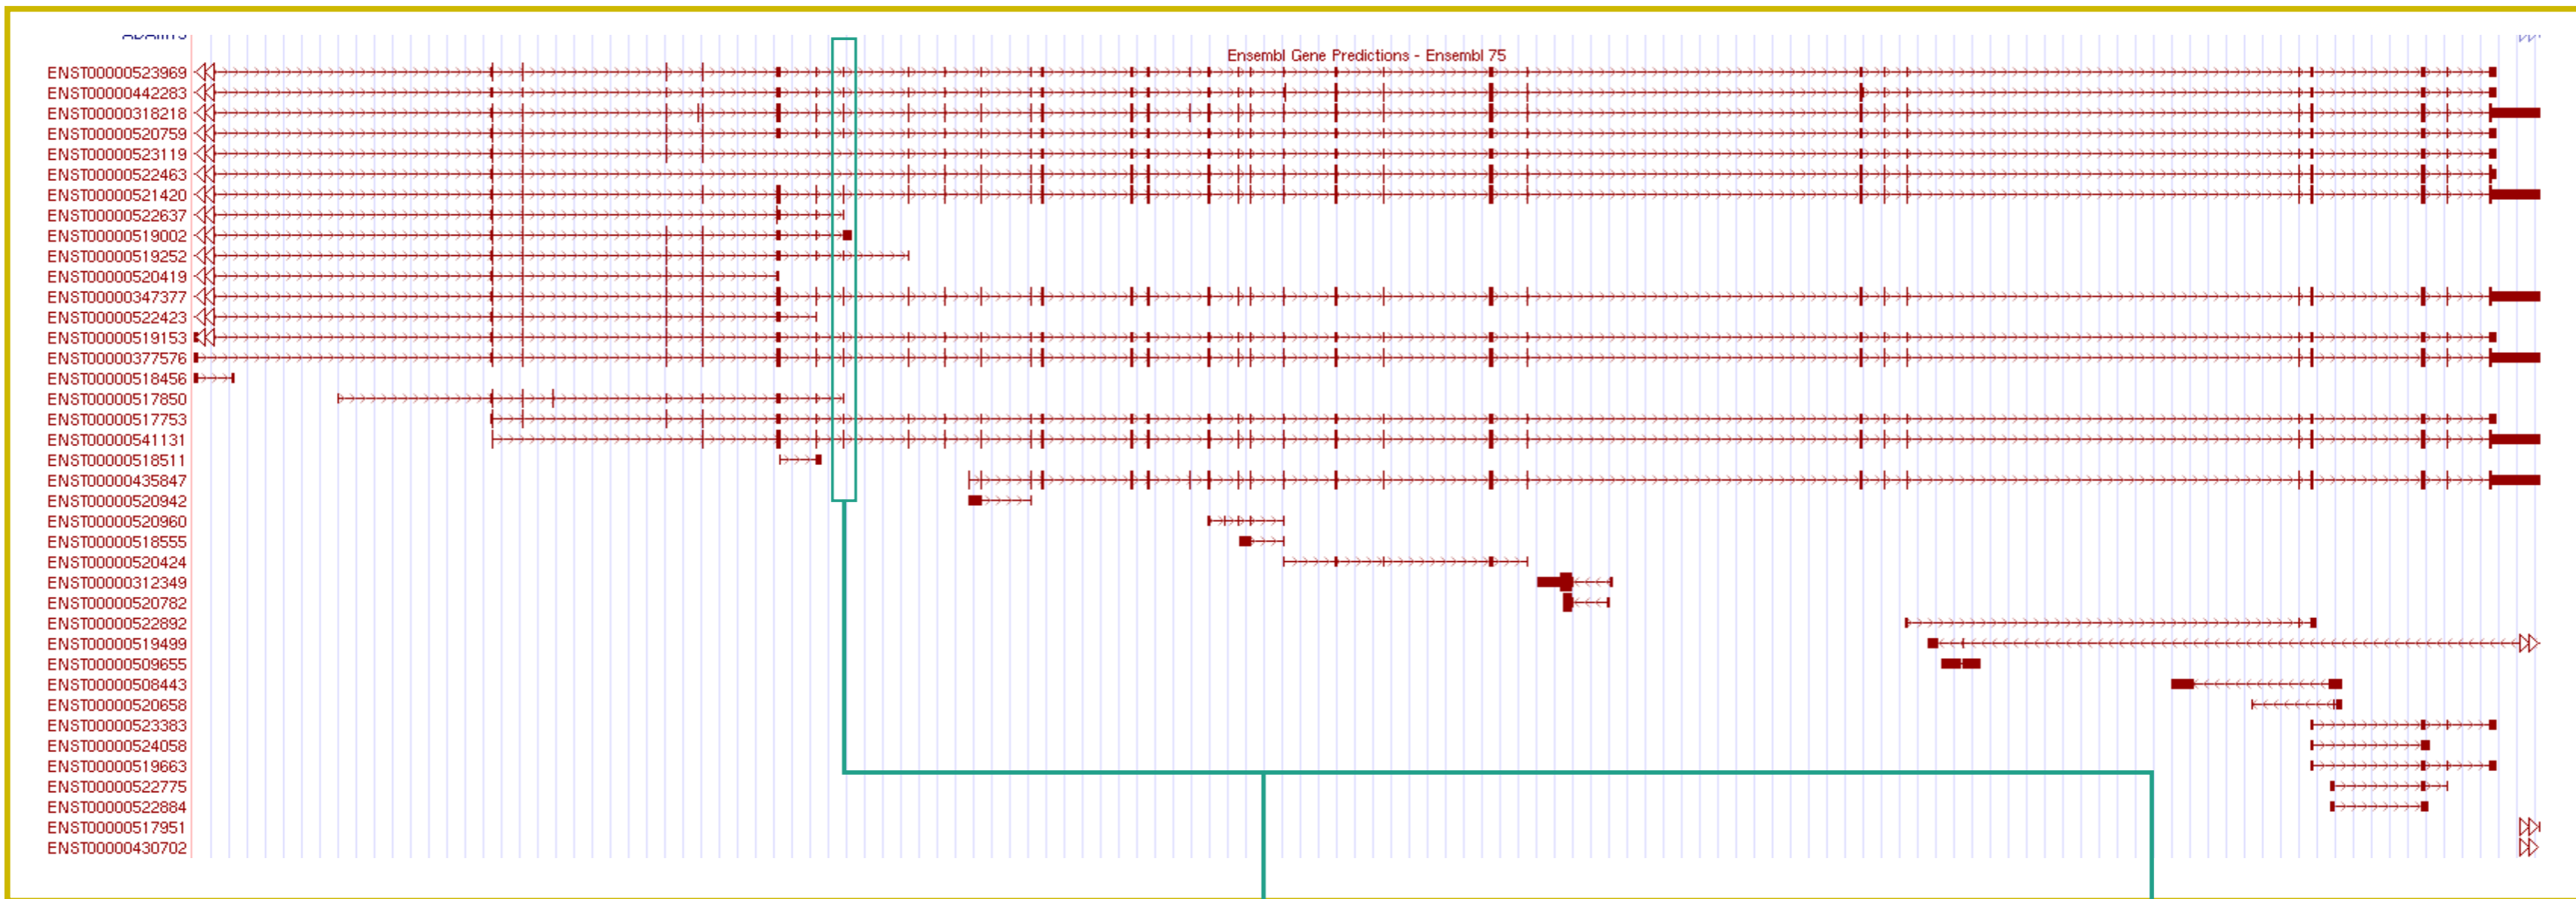

## Supplemental File 15

Gene Expression ENSG0000055163

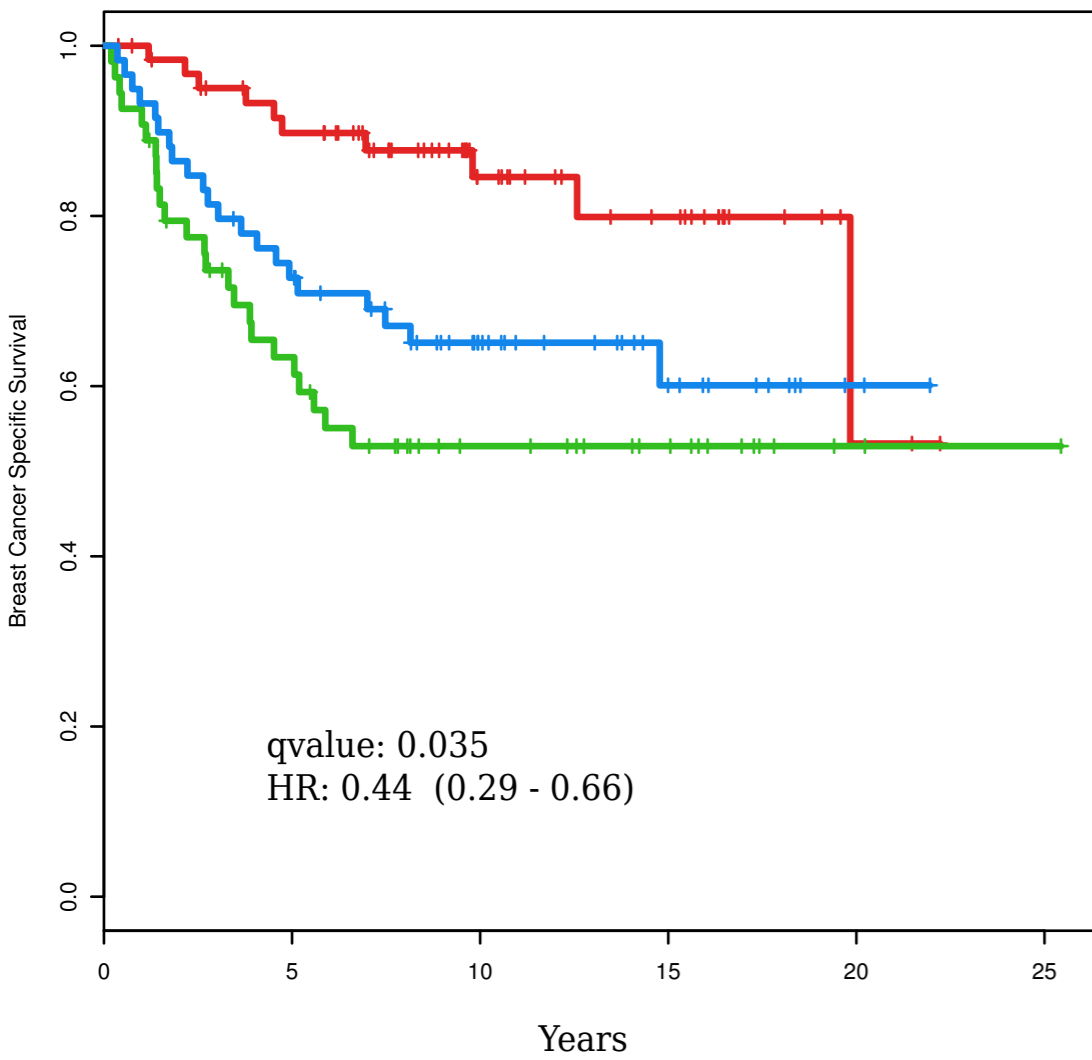

Exon Expression (chr5:156731260-15373160)

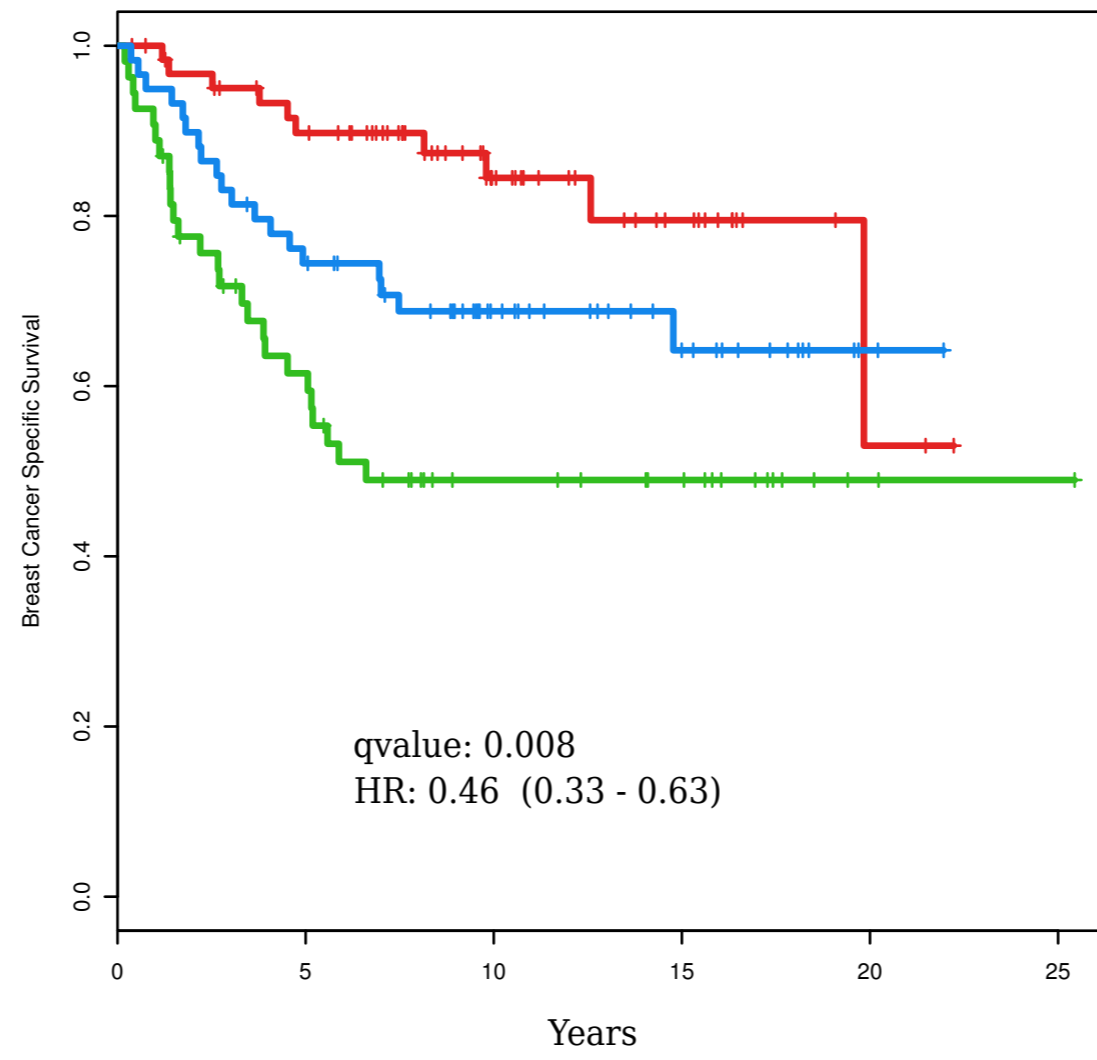

Splicing Index (chr5:156731260-156731360)

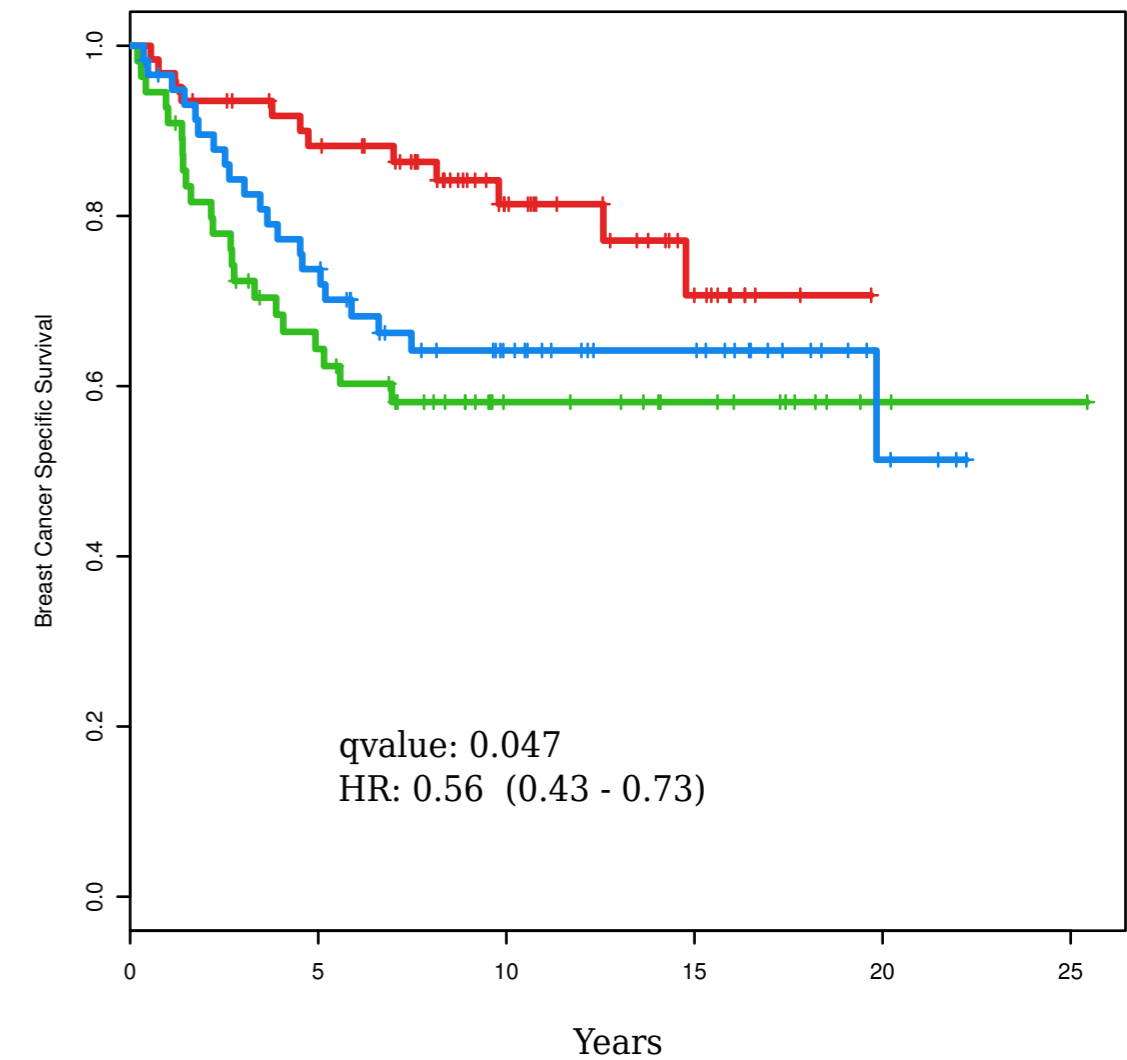

# WIPF1

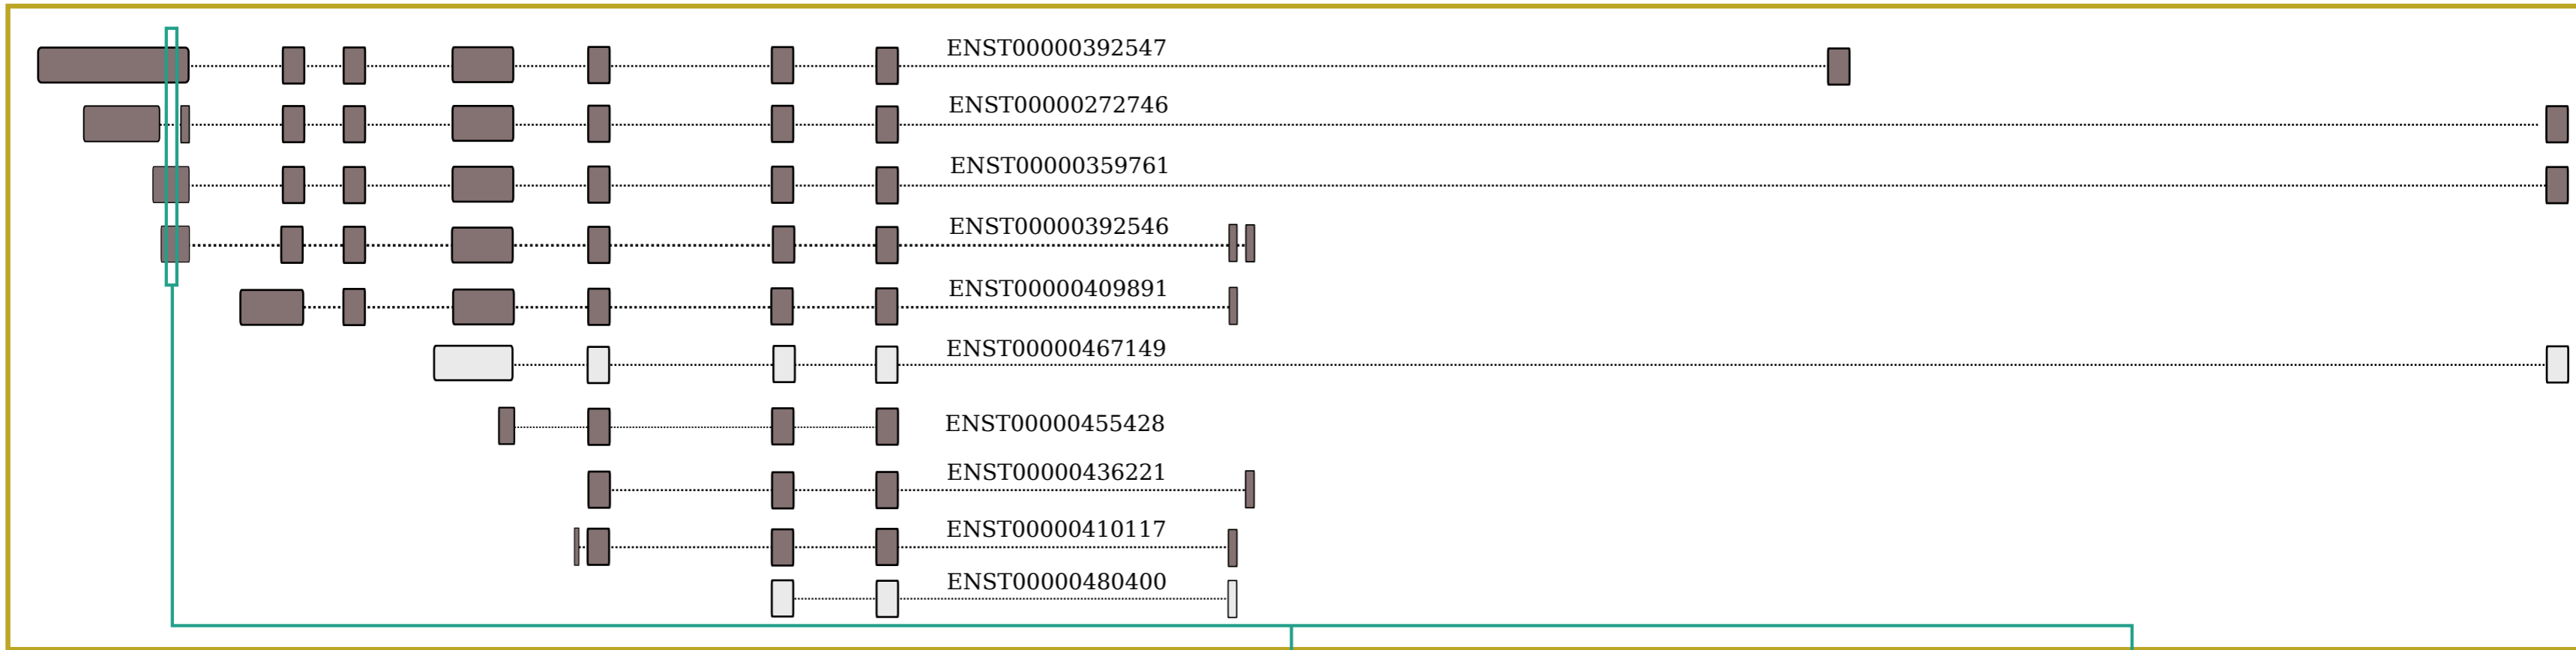

## Supplemental File 16

Gene Expression ENSG00000115935

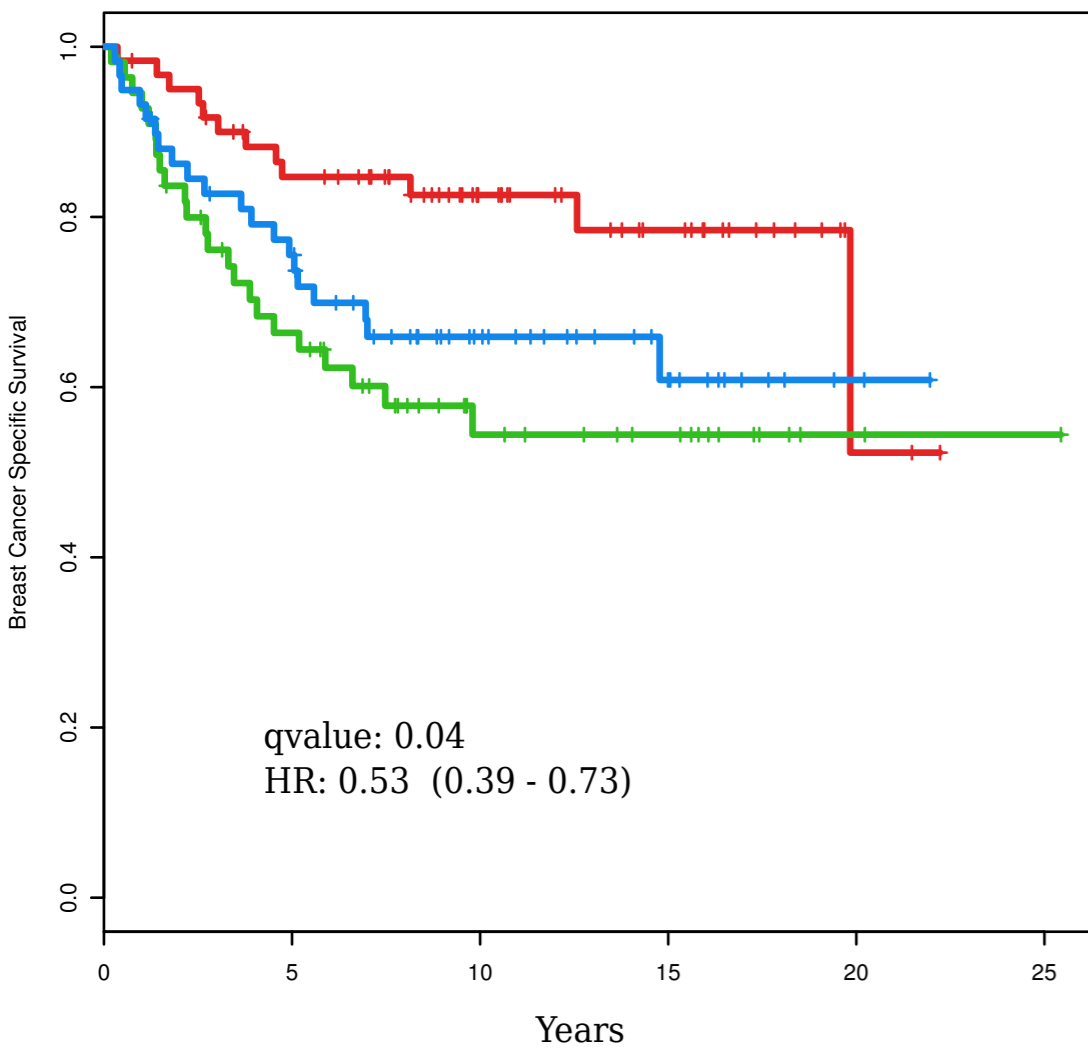

Exon Expression (chr2:175427092-175427153)

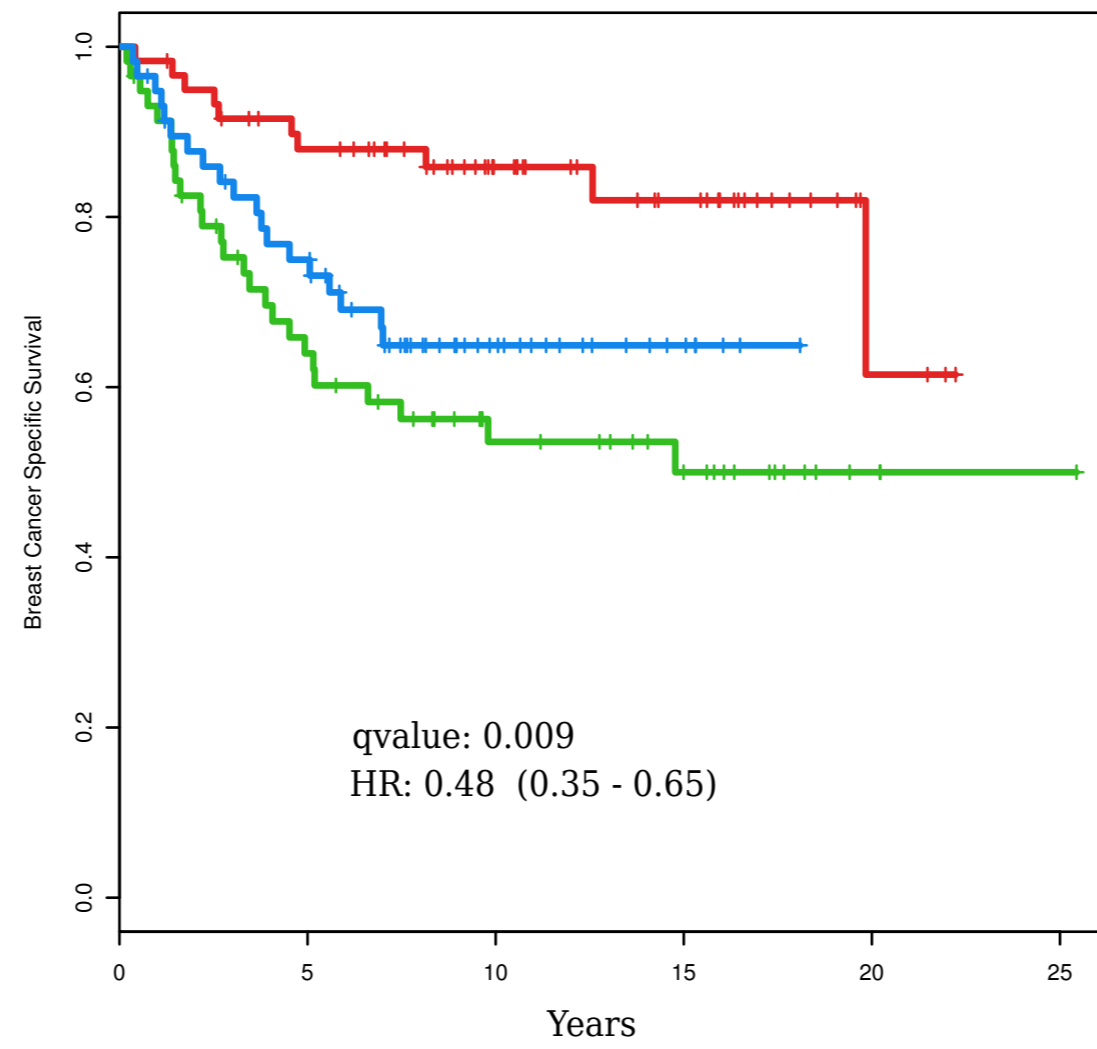

Splicing Ind (chr2:175427092-175427153)

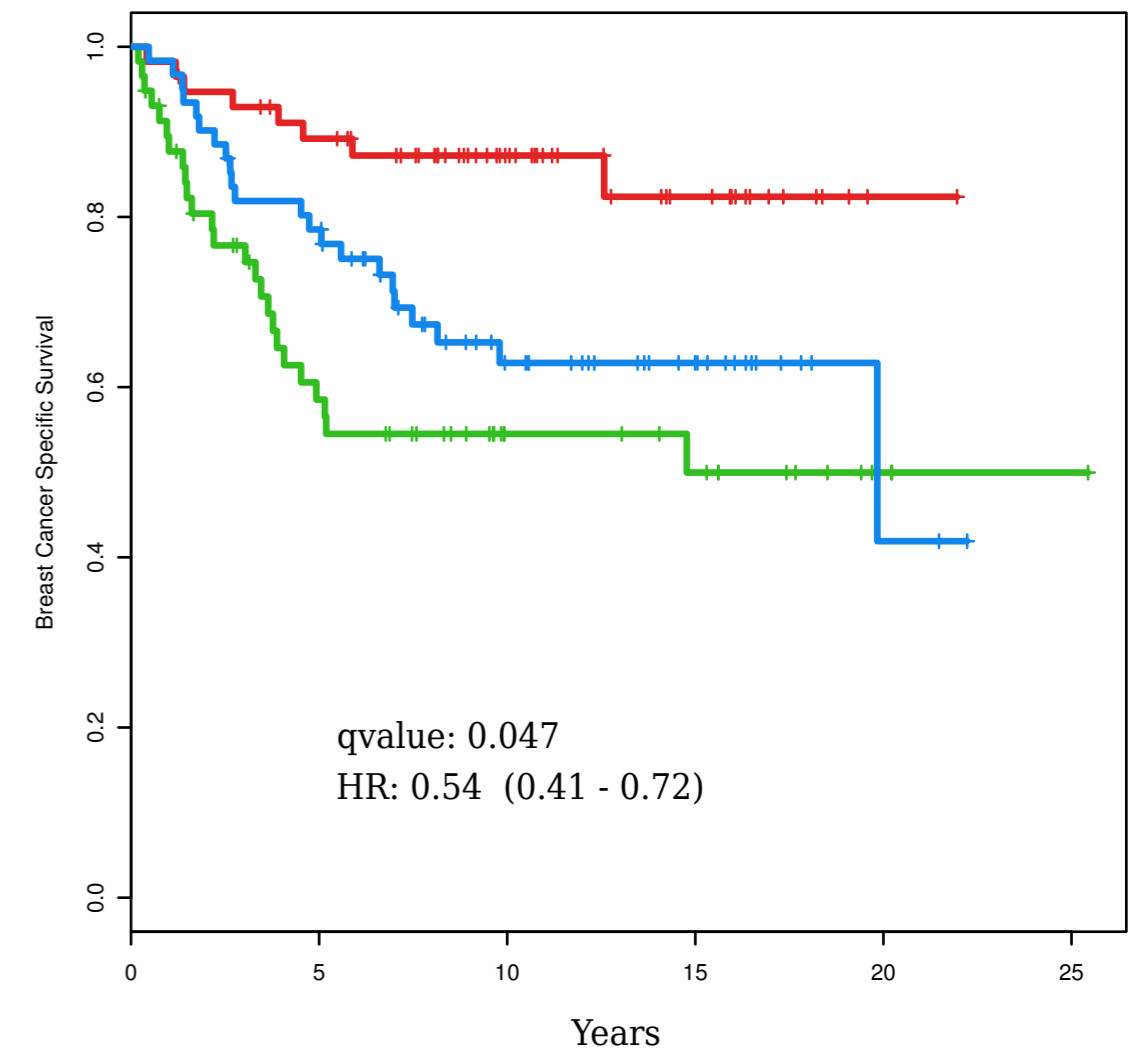

# SLAMF1

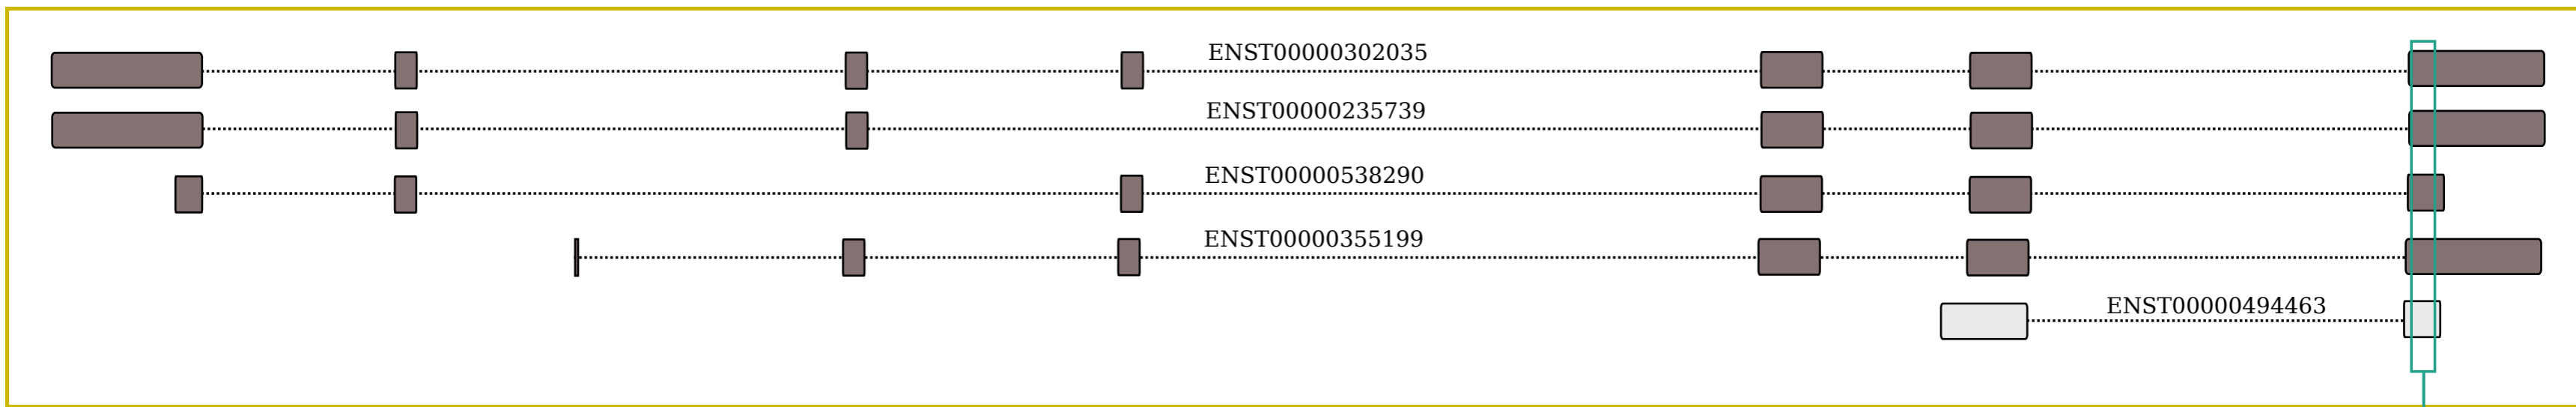

## Supplemental File 17

Gene Expression ENSG00000117090

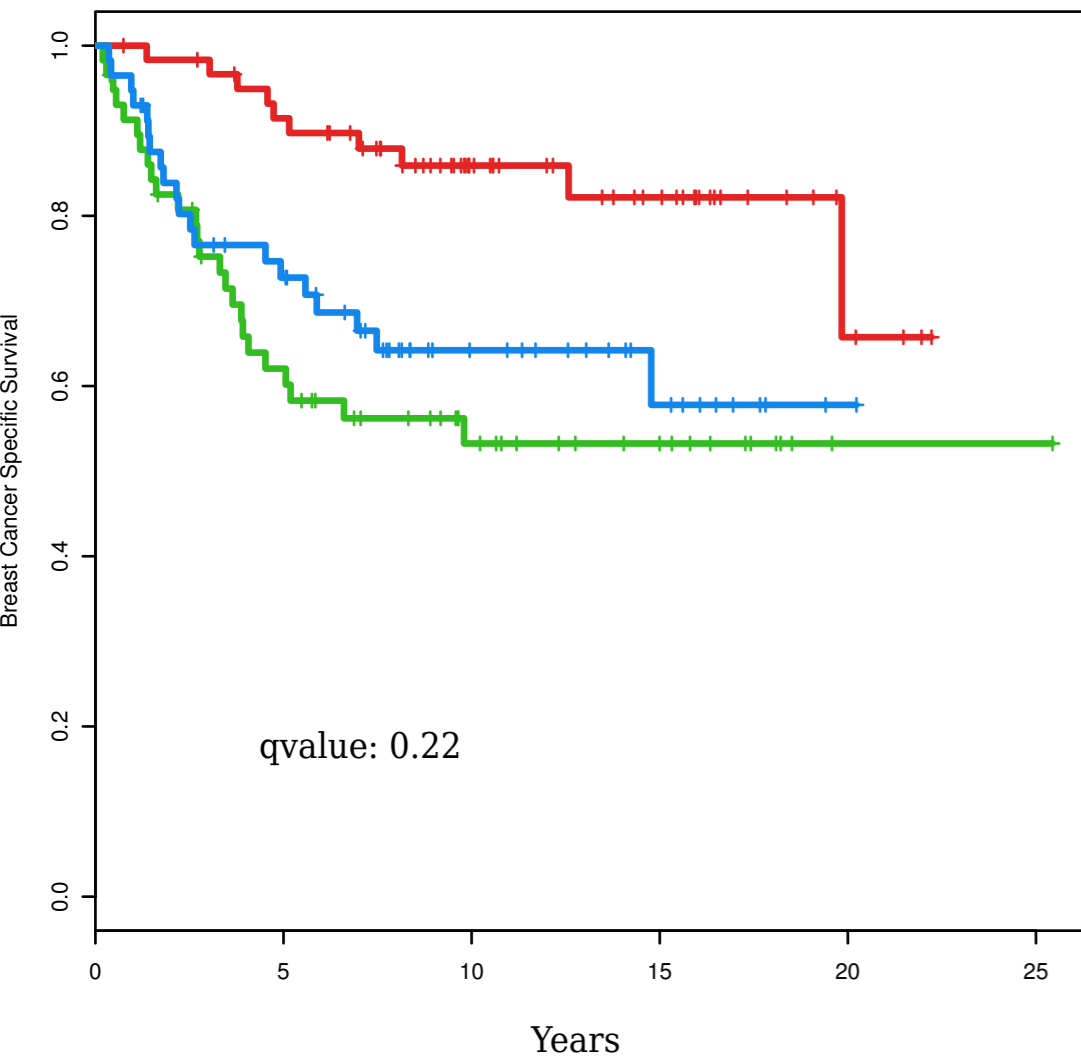

Exon Expression (chr7:160606995-160607022)

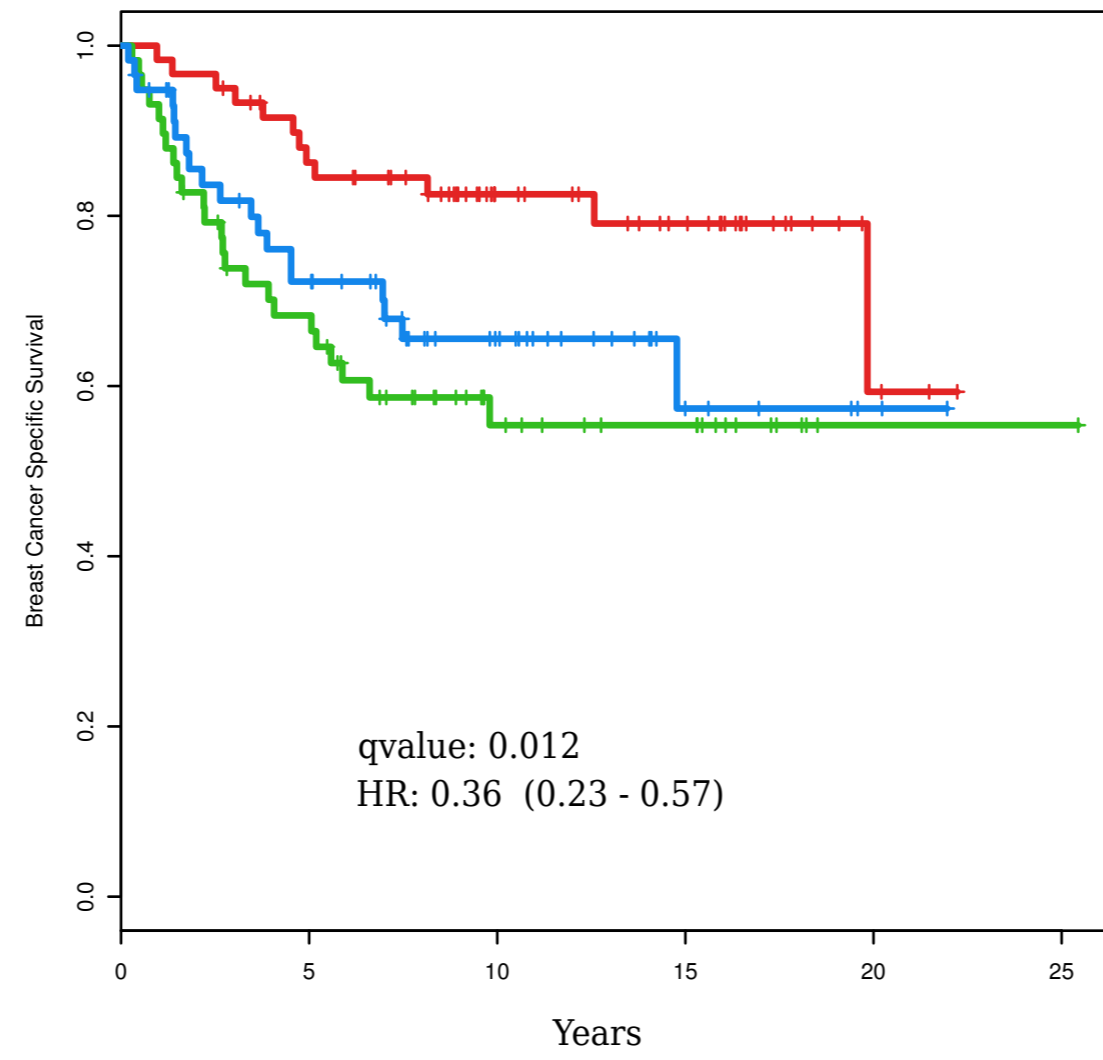

Splicing Index (chr1:160606995-160607022)

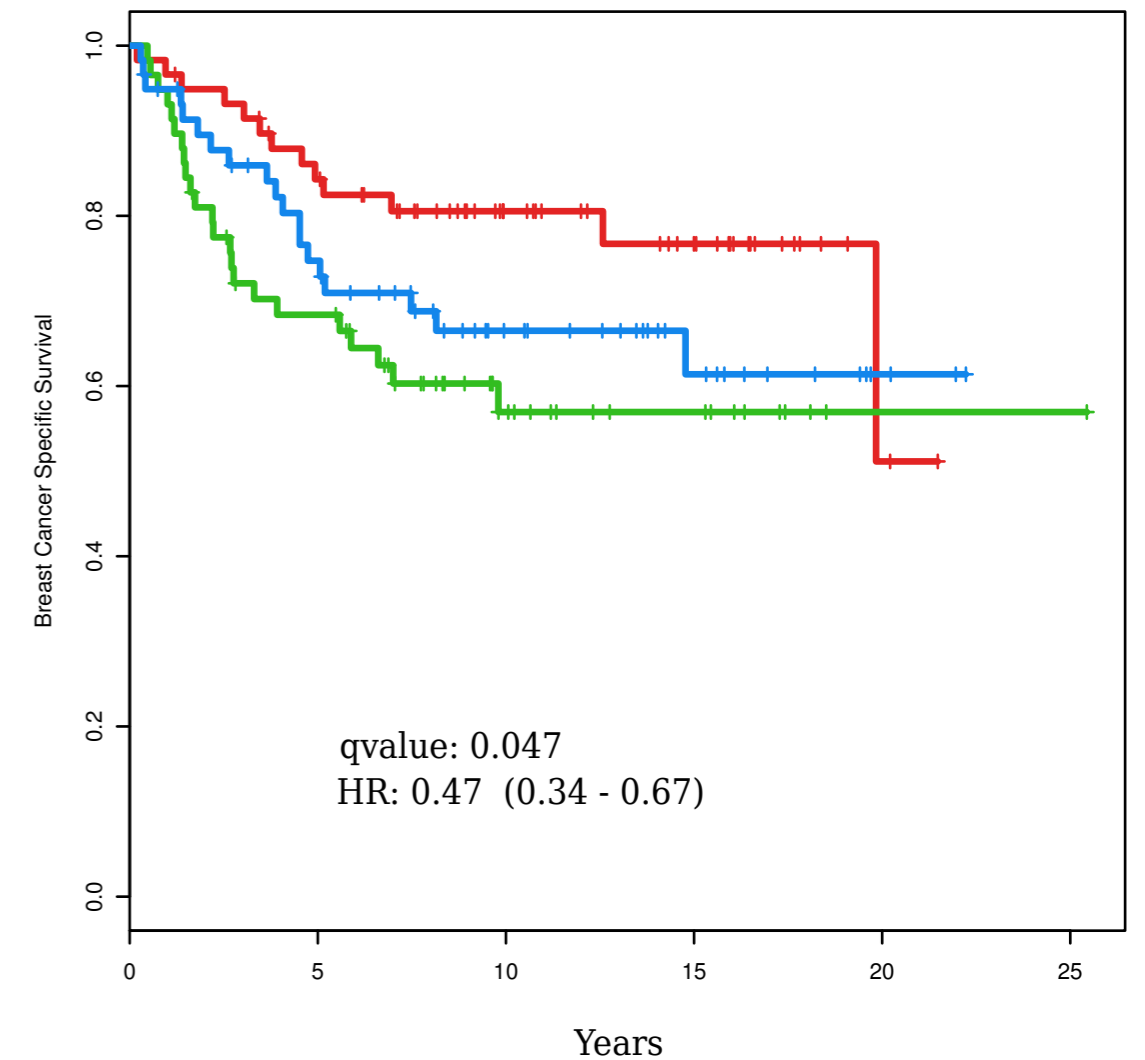

Gene Expression

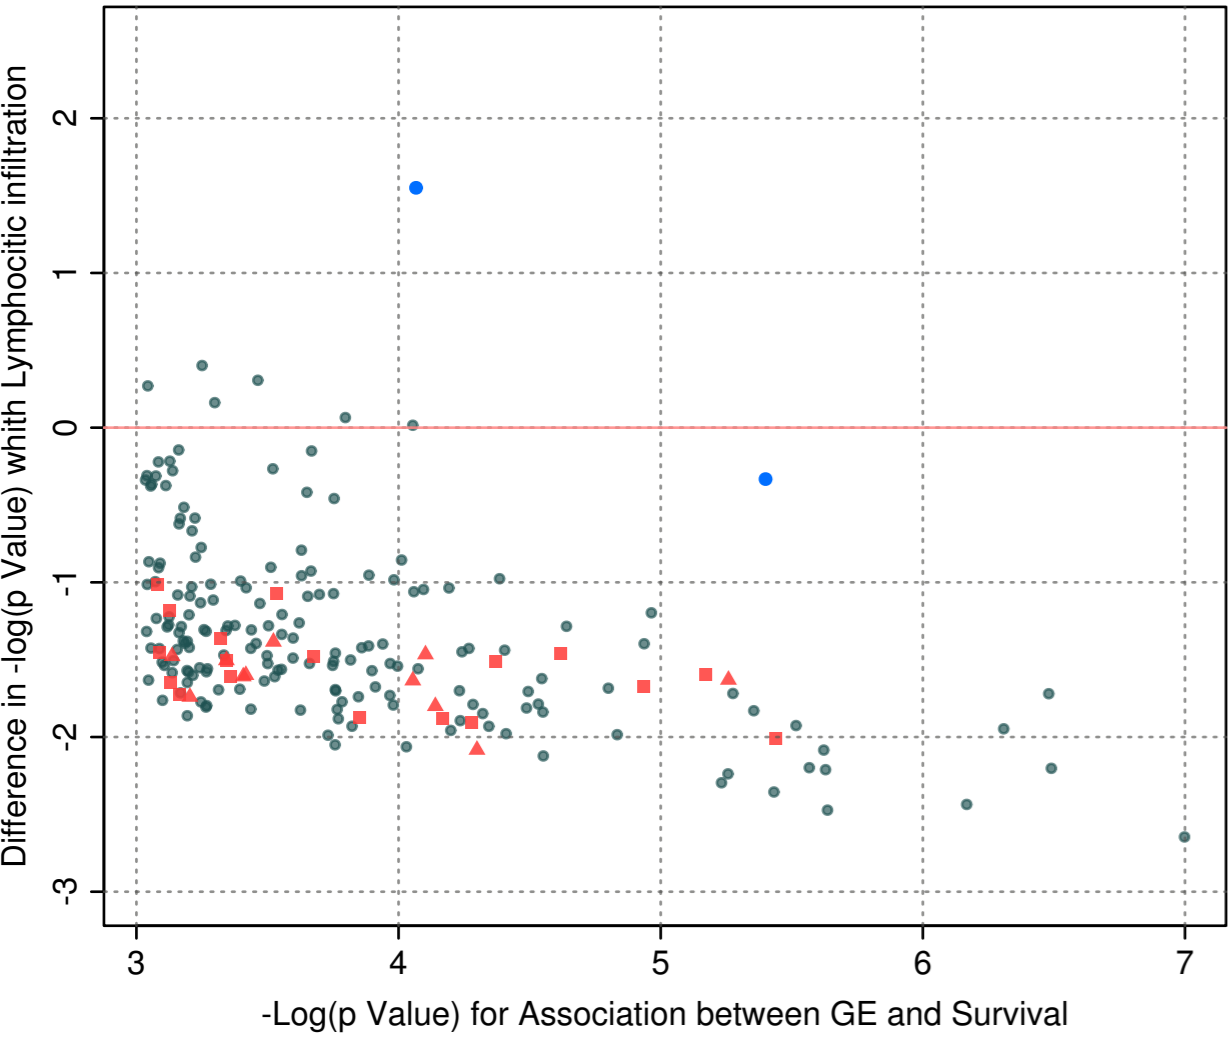

Supplemental File 18

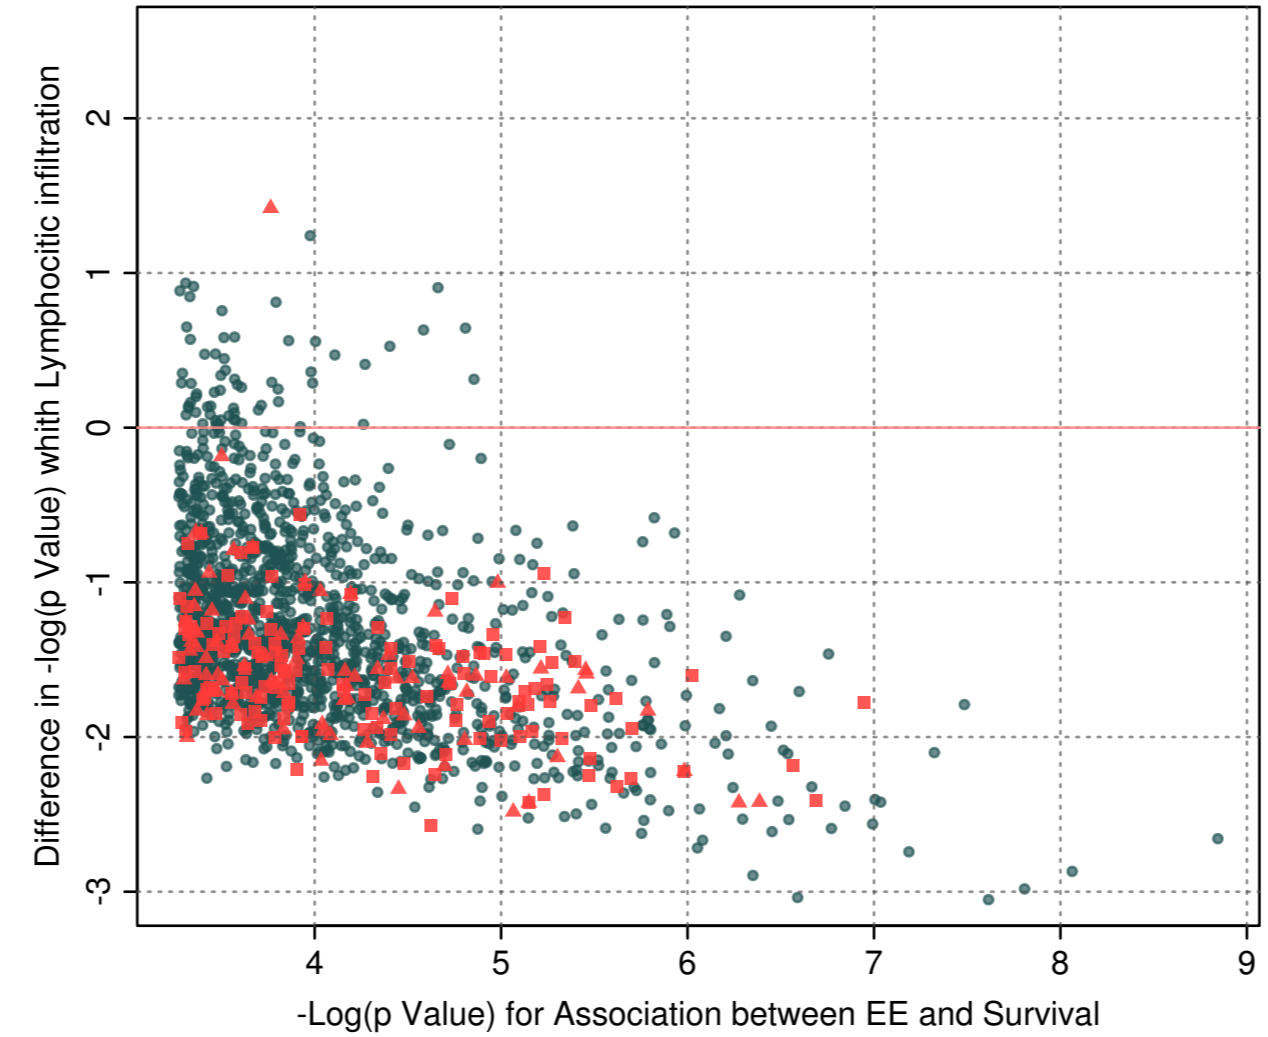

Exon Expression

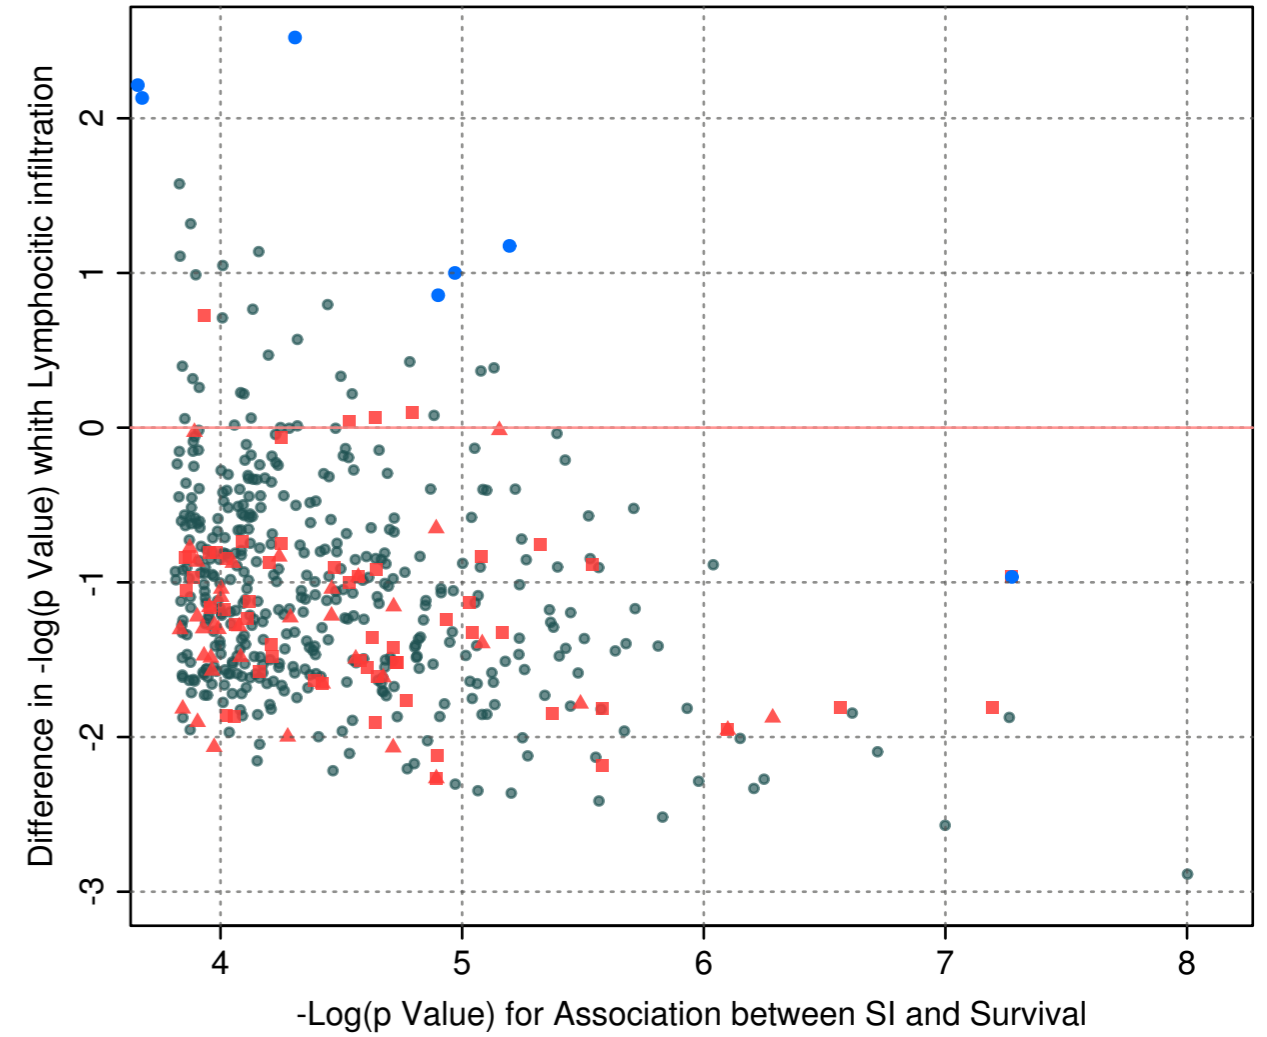

Splicing Index

# Exon Array Data Processing Workflow

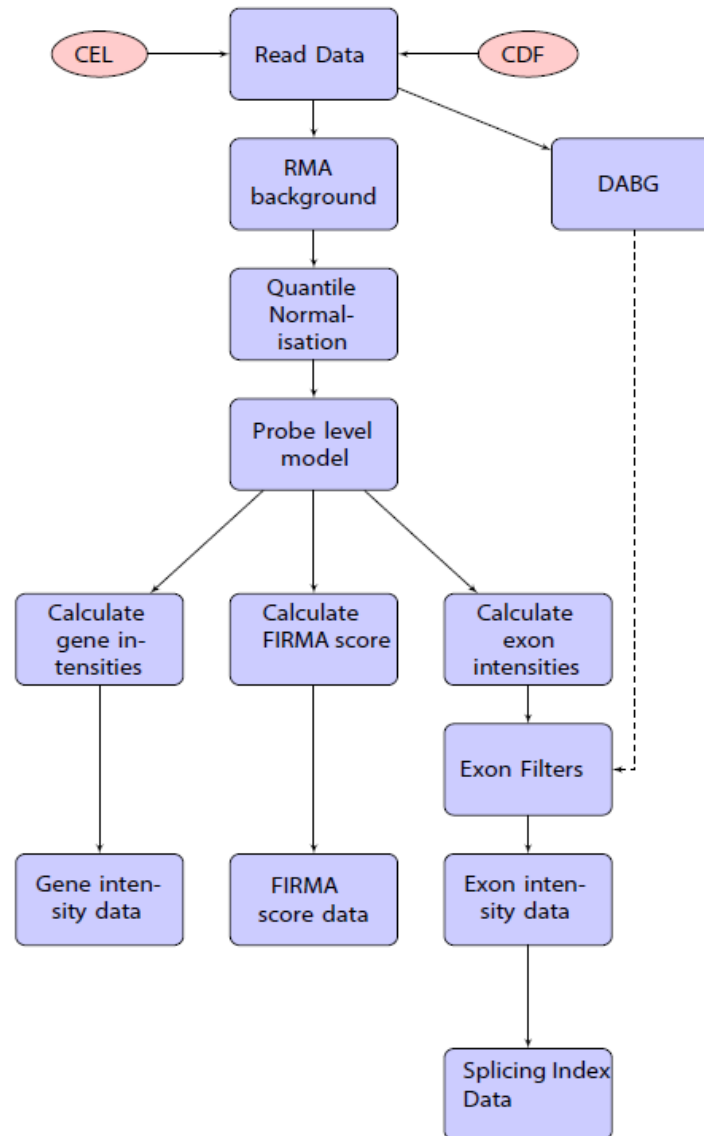

# RLE plot

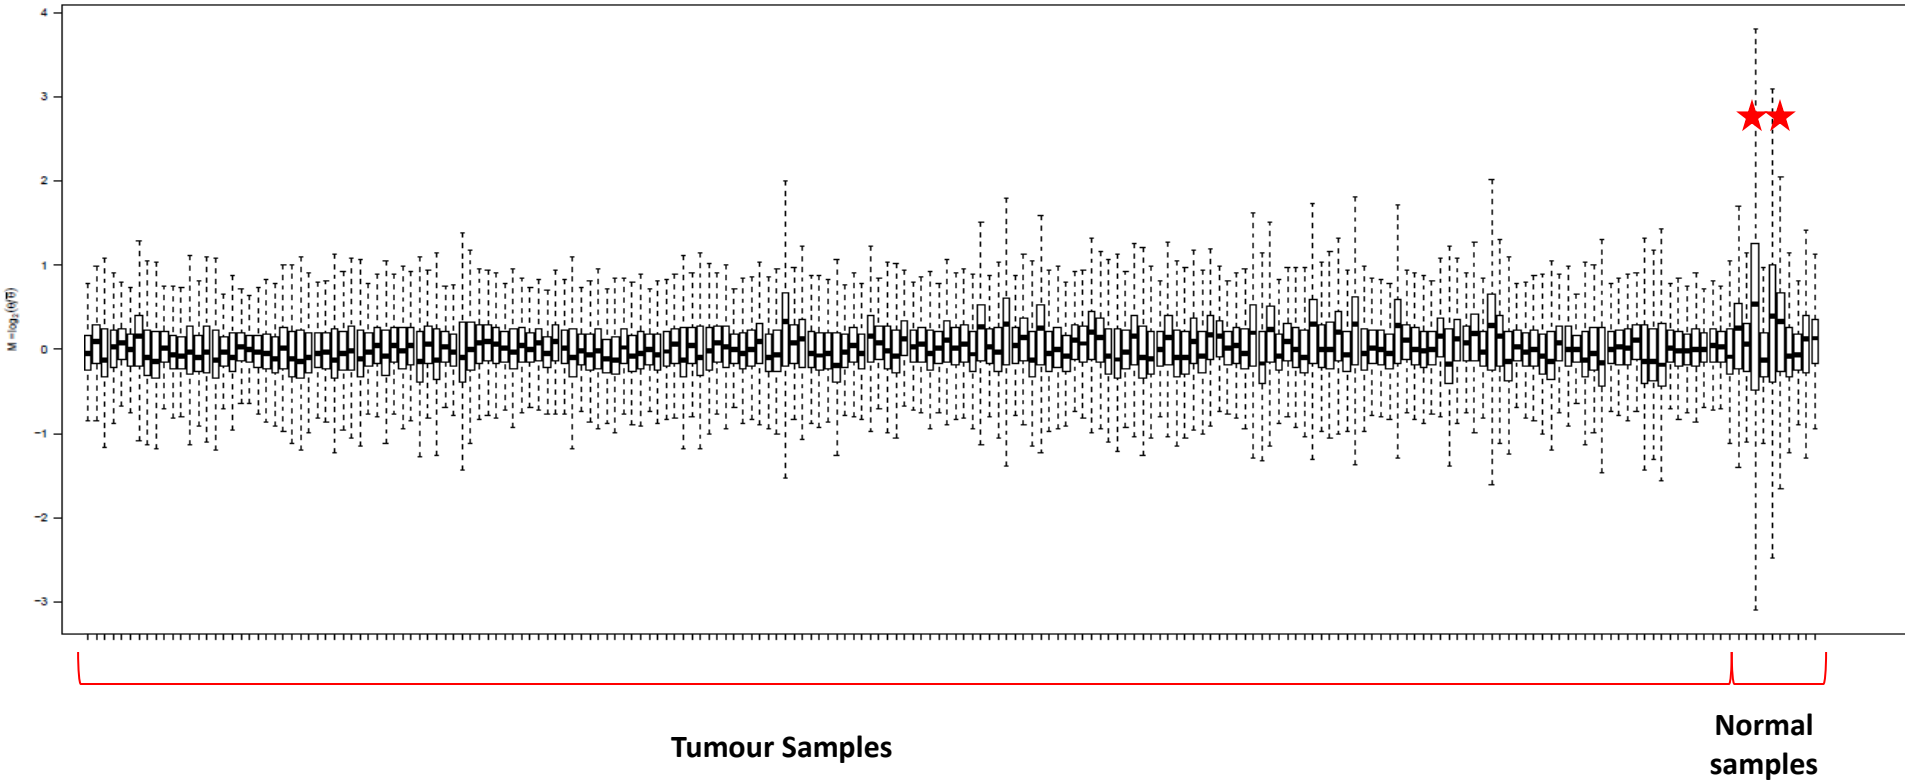

Relative Log Expression (RLE) values are computed by calculating for each probe-set the ratio between the expression of a probe-set and the median expression of this probe-set across all arrays of the experiment. The outlier normal samples highlighted by a red star were removed from the analysis

# Hierarchical Clustering

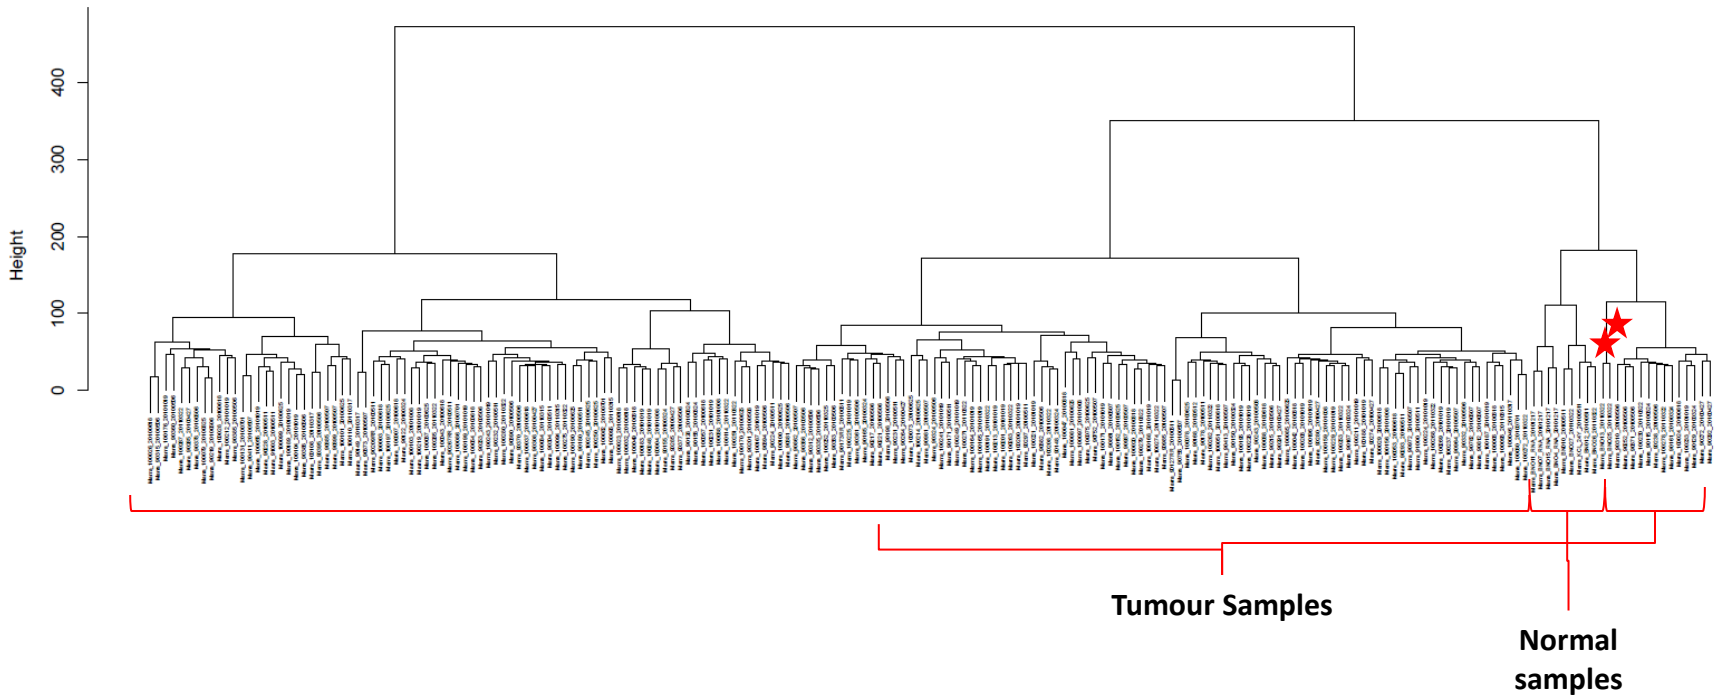

Hierarchical clustering of all samples was computed after normalization. Two normal samples not clustering with the other normal samples (highlighted by red stars) were removed from the analysis



1 **Description of additional data files**

2

3 **Description of additional data files**

4

5 Additional File 1

6 Title: Sample phenotypic information.

7 Description: Sample\_ID and Patient\_ID: anonymized sample and patient IDs;

8 SampleType: tumour or normal breast tissue; HER2, ER, PR: receptor status (P:  
9 positive, N: negative, NA: not available); Final\_Grade: Tumour Grade;

10 Percentage\_of\_Lymphocytic\_cells: percentage of lymphocytic cells infiltrated in the  
11 Tumour; Diag\_To\_LastObs:number of days between first and last observation;

12 AGE\_at\_DIAG: the patient's age at diagnosis. Surv\_Status: the patient's status at last  
13 observation (1 deceased, 2 alive); PAM50: the sample PAM50 classification.

14

15 Additional File 2

16 Title: Intrinsic molecular subtypes and clinical markers.

17 Description: Characterization of different tumour types: PR, ER, HER2 receptor  
18 status according to IHC; histological grade; molecular intrinsic subtype assigned  
19 using transcriptional data and the PAM50 algorithm.

20

21 Additional File 3

22 Title: Coefficient of determination across sub types

23 Description: Distribution of  $R^2$  values of each sample of a given group with all other  
24 samples of the same subtype (blue) or of different subtypes (red). From left to right,  
25 the three panels represent the results of the analysis using gene expression (GE), exon  
26 expression (EE) and splicing index (SI) values.

27

28 Additional File 4

29 Title: q-q plots of p-values from pairwise comparisons.

30 Description: Each of the panels shows the quantile-quantile plot for the distribution of  
31 the logarithm of p-values of a particular pairwise comparison against the logarithm of  
32 the uniform distribution. Each of the coloured lines represents different data types as  
33 indicated in the figure caption.

34

35 Additional File 5

36 Title: Classification Models.

37 Description: Sensitivity and Specificity plots for a classification model built to  
38 classify basal-like tumours and NBT. The horizontal axis represents the number of  
39 variables used in the model, the vertical axis represents sensitivity (in solid) and  
40 specificity (in dashed) measures. Different coloured lines refer to the different  
41 variables used. Variables were chosen at random from all genes/exons. More  
42 variables, naturally improve model quality.

43

44 Additional File 6

45 Title: Samples clustering using Principal Components Analysis (PCA).

46 Description: Principal components analysis on three types of data: gene expression  
47 (leftmost panel), exon expression (center panel) and splicing index (rightmost panel).  
48 Normal breast tissue samples are represented in red, and basal-like tumour samples in  
49 black. On the horizontal axis the second principal component, and on the vertical axis  
50 is the third principal component.

51

52 Additional File 7

53 Title: Comparison with independent studies

54 Description: Results of comparison between our results and three independent studies.

55

56 Additional File 8

57 Title: Experimental validation of differential splicing on 9 genes

58 Description: Description of the experimental protocol used and the results obtained  
59 for 9 genes differentially spliced in basal-like tumours vs normal samples or in basal-  
60 like tumours with good vs bad prognosis

61

62

63 Additional File 9

64 Title: Pathway Analysis Results

65 Description: 1st worksheet: Results from Ingenuity Pathway Analysis (IPA) for the  
66 set of genes only differentially spliced between basal-like and Normal Breast Tissue

67 Ingenuity Canonical Pathways: the name of the pathway in the Ingenuity database. –

68  $\log(p\text{-value})$ : the statistical significance of the enrichment as reported by Ingenuity.

69 Ratio: the fraction of genes in the IPA pathway that overlapped the input list.

70 Molecules: the names of the genes in the input gene list that are part of the IPA

71 canonical pathway. 2<sup>nd</sup> and 3rd worksheets: p-values for gene set enrichment of

72 differentially expressed or spliced genes against the gene sets of Molecular Signatures

73 Database (MSigDb)

74 Additional File 10

75 Title: Paxillin Signalling Pathway

76 Description: The paxillin signalling pathway as represented by Ingenuity (Ingenuity<sup>®</sup>

77 Systems). In purple are genes affected by differential splicing between basal-like

78 tumours and normal breast tissues, with no evidence of whole-gene differential

79 expression.

80

81 Additional File 11

82 Title: Gene sets perturbed at Splicing Index but not Gene Expression level – complete  
83 results.

84 Description: In this heatmap, each column is a pairwise comparison (either at GE or

85 SI level), each row is a gene set and colour coded is the  $\log_{10}p\text{ value}$  for significant

86 enrichment of that gene set for the list of differentially spliced genes for the respective  
87 pairwise comparison.

88

89 Additional File 12

90 Title: q-q plots of the p-values for association with Survival.

91 Description: Panels represent, from left to right, Gene Expression, Exon Expression,  
92 Splicing Index. Deviations from the diagonal (in red) indicate that the p-values differ  
93 from the theoretical uniform distribution expected for no association with survival.

94

95 Additional File 13

96 Title: Validation of survival analysis results using external data sets

97 Description: Document describing the rationale and the results obtained on gene  
98 expression and survival association from external datasets

99

100 Additional File 14.

101 Title: Results of Survival Analysis.

102 Description: This table contains all genes where either total expression or splicing  
103 index could be associated with survival in basal-like breast cancer. The 1<sup>st</sup> and 2<sup>nd</sup>  
104 worksheets contain respectively gene and exon level information. The 1<sup>st</sup> contains all  
105 the genes where at least one exon that could be associated with survival in basal-like  
106 breast cancer, either by their expression level, or by their splicing index (SI). It  
107 includes the Ensemble ID, the gene symbol, the coordinates of the probeset, the q-  
108 value and hazard ratios for association with survival in the one-factor model with EE,  
109 the q-value and hazard ratios for association with survival in the one-factor model  
110 with SI, the q value and hazard ratios for association with survival in the two-factor  
111 models (i.e. EE + lymphocytic infiltration, and SI + lymphocytic infiltration).

112 Additional File 15

113 Title: Kaplan–Meier curves for CYFIP2

114 Description: On the top: a schematic representation of the exon level gene model for  
115 CYFIP2 (taken from UCSC genome browser). On the bottom: the three panels, from  
116 left to right, show Kaplan-Meier survival curves for Gene Expression, Exon  
117 Expression, and Splicing Index. In each plot, the three lines represent the top tercile  
118 (red), middle tercile (blue), and lower tercile (green) for the value of the variable. In  
119 insert are the q-value for association with survival, and the hazard ratio with 95%  
120 confidence intervals.

121

122 Additional File 16

123 Title: Kaplan–Meier curves for WIPF1.

124 Description: On the top: a schematic representation of the exon level gene model for  
125 WIPF1 (not in scale). Dark grey represent protein coding isoforms, and light grey  
126 non-coding. On the bottom: the three panels, from left to right, show Kaplan-Meier  
127 survival curves for Gene Expression, Exon Expression, and Splicing Index. In each  
128 plot, the three lines represent the top tercile (red), middle tercile (blue), and lower  
129 tercile (green) for the value of the variable. In insert are the q-value for association  
130 with survival, and the hazard ratio with 95% confidence intervals.

131 Additional File 17

132 Title: Kaplan–Meier curves for SLAMF1

133 Description: On the top: a schematic representation of the exon level gene model for  
134 SLAMF1 (not in scale). Dark grey represent protein coding isoforms, and light grey  
135 non-coding. On the bottom: the three panels, from left to right, show Kaplan-Meier  
136 survival curves for Gene Expression, Exon Expression, and Splicing Index. In each  
137 plot, the three lines represent the top tercile (red), middle tercile (blue), and lower  
138 tercile (green) for the value of the variable. In insert are the q-value for association  
139 with survival, and the hazard ratio with 95% confidence intervals.

140

141 Additional File 18

142 Title: Effect of lymphocytic infiltration in survival multivariate model.

143 Description: Panels, from left to right, are for Gene Expression, Exon Expression, and  
144 Splicing Index. Each point in the plot is a gene or probe; the horizontal axis shows the  
145  $\log_{10}pval$  for association with survival in the univariate Cox Hazard model (GE, EE, or  
146 SI), and the vertical axis shows the difference in  $\log_{10}ppval$  for that gene/exon when  
147 lymphocytic infiltration is introduced as an additional covariate in the multivariate  
148 model. Negative values on this axis indicate loss of significance. Highlighted in red  
149 are genes related to lymphocytic function, as assessed either by gene expression or by  
150 database functional annotations (see Materials and Methods). Highlighted in blue are  
151 genes retaining statistical significance in the multivariate model.

152

153 Additional File 19

154 Title: Exon Array data processing analytical workflow and QCs

155 Description: Overview of the Exon Array data processing analytical workflow and  
156 results from microarray QC

157

158 Additional File 20

159 Title: Excel file with gene- and exon-level results of comparative analyses.

160 Description: q-values, and log fold change for statistically significant differences  
161 between sample groups (genes and exons showing no significance in any of the tests,  
162 were omitted from the table).

163
